# Supplementary material for: Chemoenzymatic formal synthesis of (−)- and (+)-epibatidine
Source: Royal Society of Chemistry journal article supplement (doi:10.1039/c2ob06904k), 2012-01-01

## Supporting information

### Chemoenzymatic Synthesis of (-)-Epibatidine

Derek R. Boyd, Narain D. Sharma, Magdalena Kaik, Peter B. A. McIntyre,  
Paul J Stevenson \* and Christopher C. R. Allen

*School of Chemistry and Chemical Engineering, School of Biological Sciences,  
Queen's University of Belfast, Belfast BT9 5AG, UK.*

p.stevenson@qub.ac.uk

## Index

|                                                                                     |        |
|-------------------------------------------------------------------------------------|--------|
| Title and authors                                                                   | S1     |
| Contents of Supporting Information                                                  | S2     |
| <b>NMR Spectra Epibatidine and intermediates</b>                                    |        |
| Copies of <sup>1</sup> H and <sup>13</sup> C NMR spectra of compound (-)- <b>3</b>  | S3-4   |
| Copy of <sup>1</sup> H spectrum of compound <b>4</b>                                | S5     |
| Copies of <sup>1</sup> H and <sup>13</sup> C NMR spectra of compound (+)- <b>7</b>  | S6-7   |
| Copies of <sup>1</sup> H and <sup>13</sup> C NMR spectra of compound (+)- <b>8</b>  | S8-9   |
| Copies of <sup>1</sup> H and <sup>13</sup> C NMR spectra of compound (+)- <b>9</b>  | S10-11 |
| Copies of <sup>1</sup> H and <sup>13</sup> C NMR spectra of compound (-)- <b>10</b> | S12-13 |
| Copies of <sup>1</sup> H and <sup>13</sup> C NMR spectra of compound (-)- <b>11</b> | S14-15 |
| Copies of <sup>1</sup> H and <sup>13</sup> C NMR spectra of compound (-)- <b>12</b> | S16-17 |
| Copies of <sup>1</sup> H and <sup>13</sup> C NMR spectra of compound <b>13</b>      | S18-19 |
| Copies of <sup>1</sup> H and <sup>13</sup> C NMR spectra of (-)- <b>epibatidine</b> | S20-21 |
| Copies of <sup>1</sup> H and <sup>13</sup> C NMR spectra of compound (+)- <b>14</b> | S22-23 |
| Copies of <sup>1</sup> H and <sup>13</sup> C NMR spectra of compound (-)- <b>15</b> | S24-25 |

# $^1\text{H}$ - and $^{13}\text{C}$ -NMR spectra of (-)-epibatidine and intermediates

## $^1\text{H}$ -NMR spectrum of compound (-)-3 in $\text{CDCl}_3$

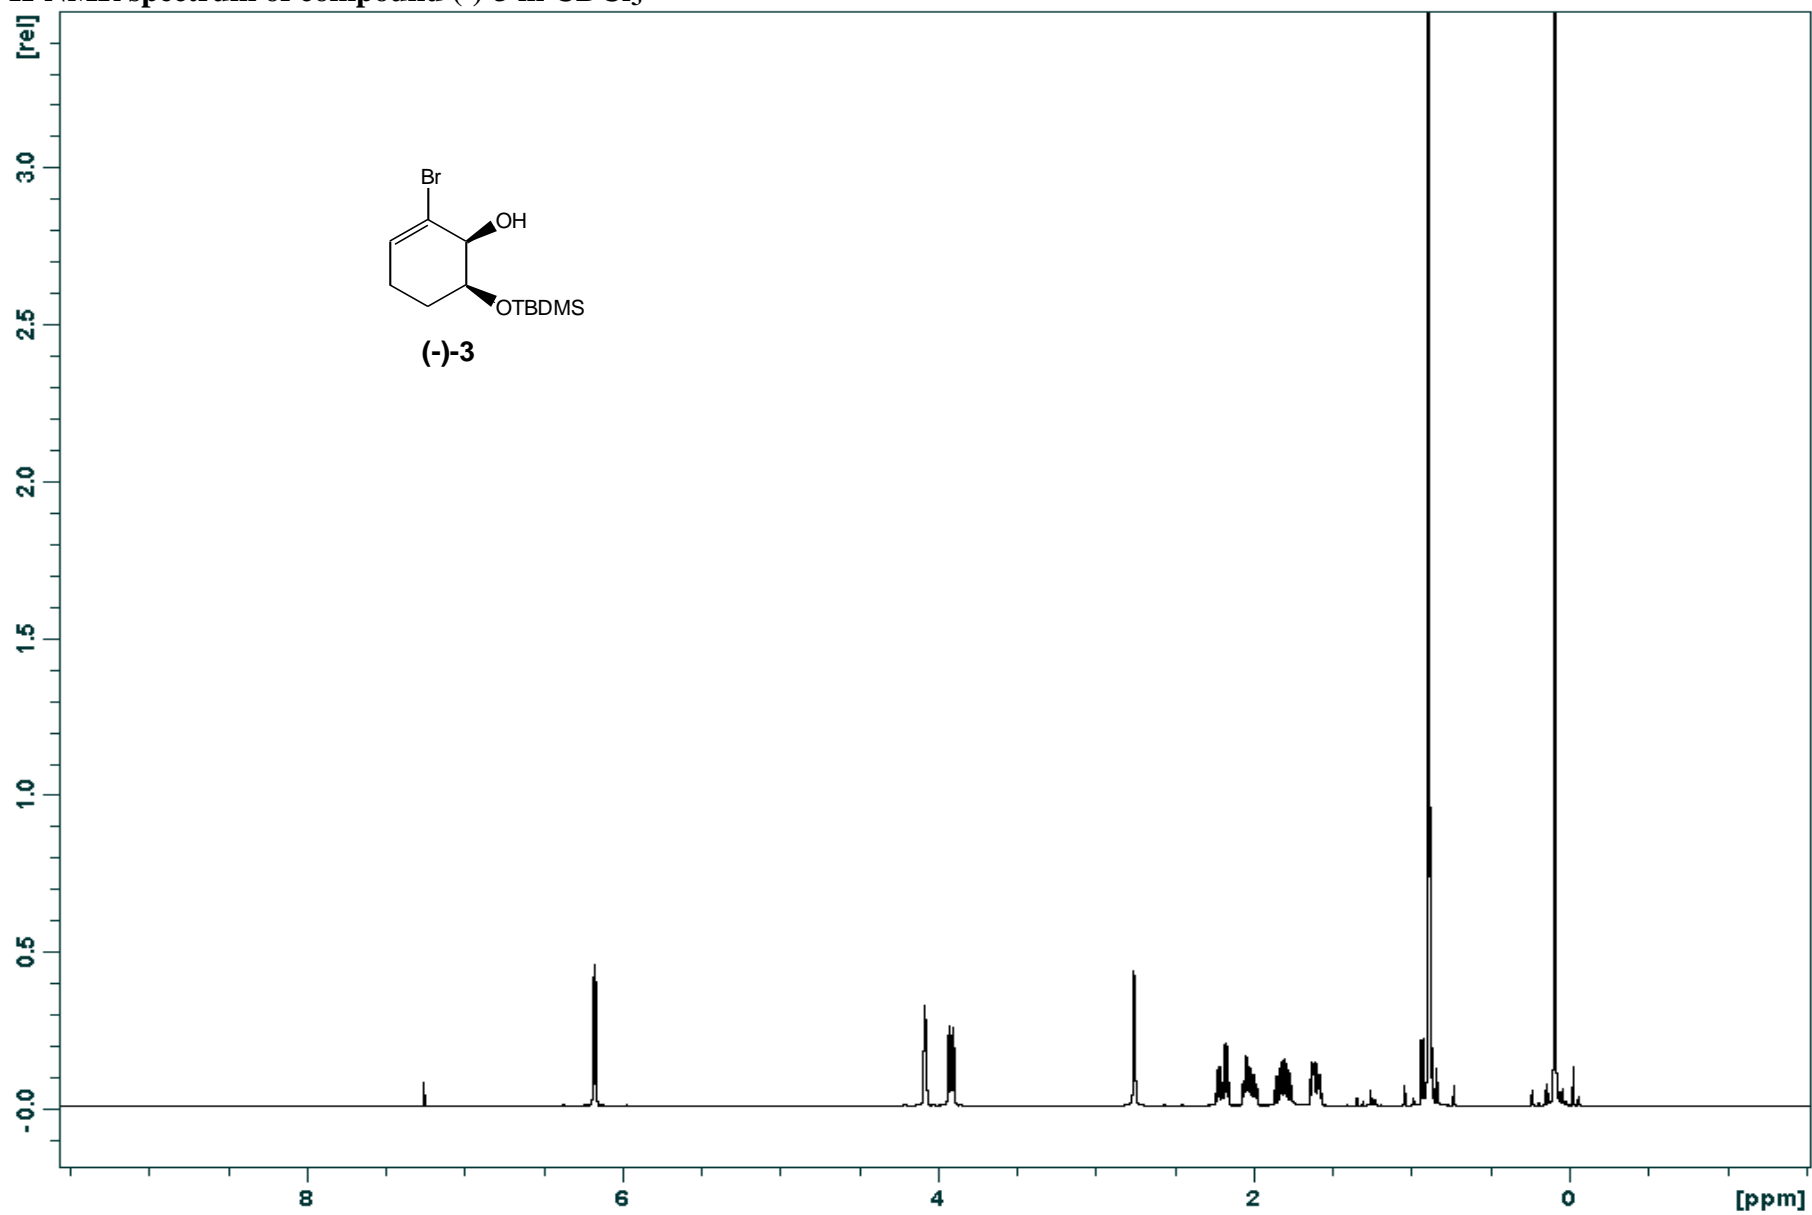

$^{13}\text{C}$ -NMR spectrum of compound (-)-3 in  $\text{CDCl}_3$

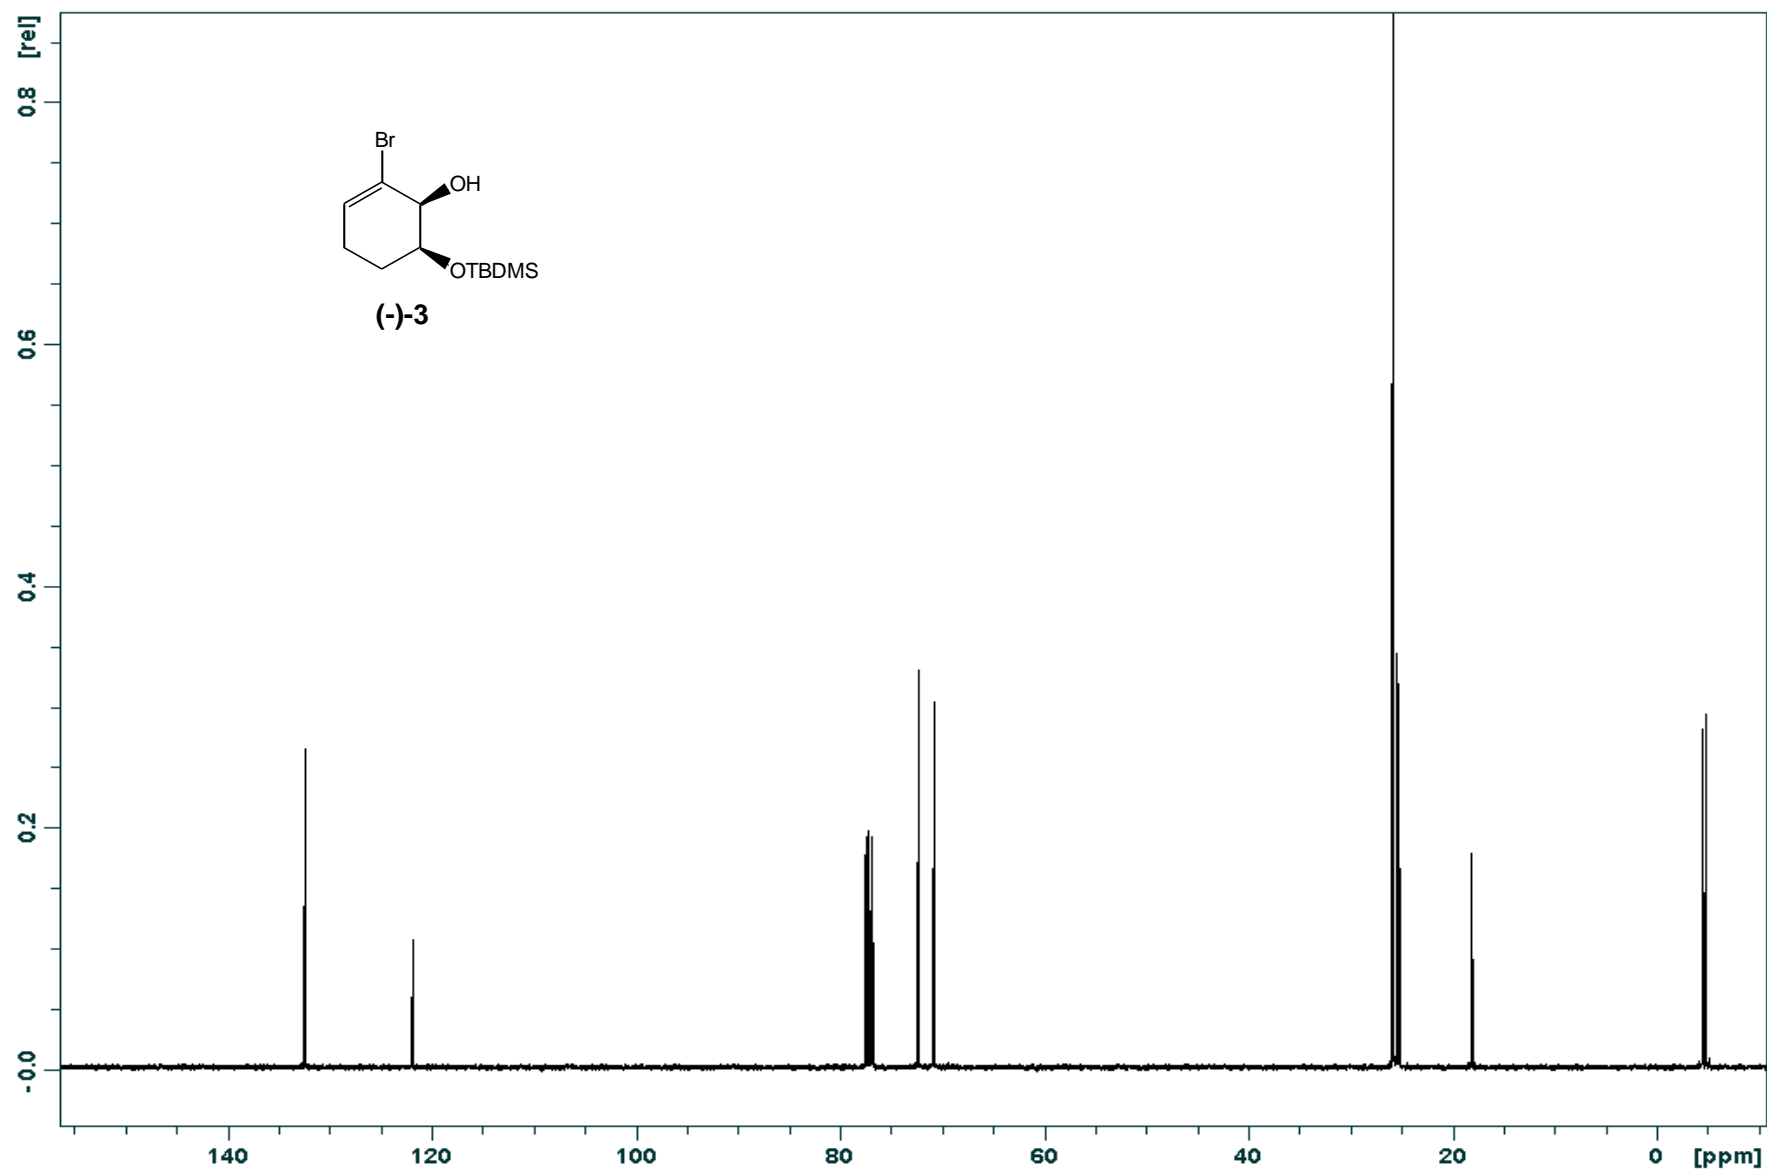



**$^1\text{H-NMR}$  spectrum of compound (+)-7 in  $\text{CDCl}_3$**

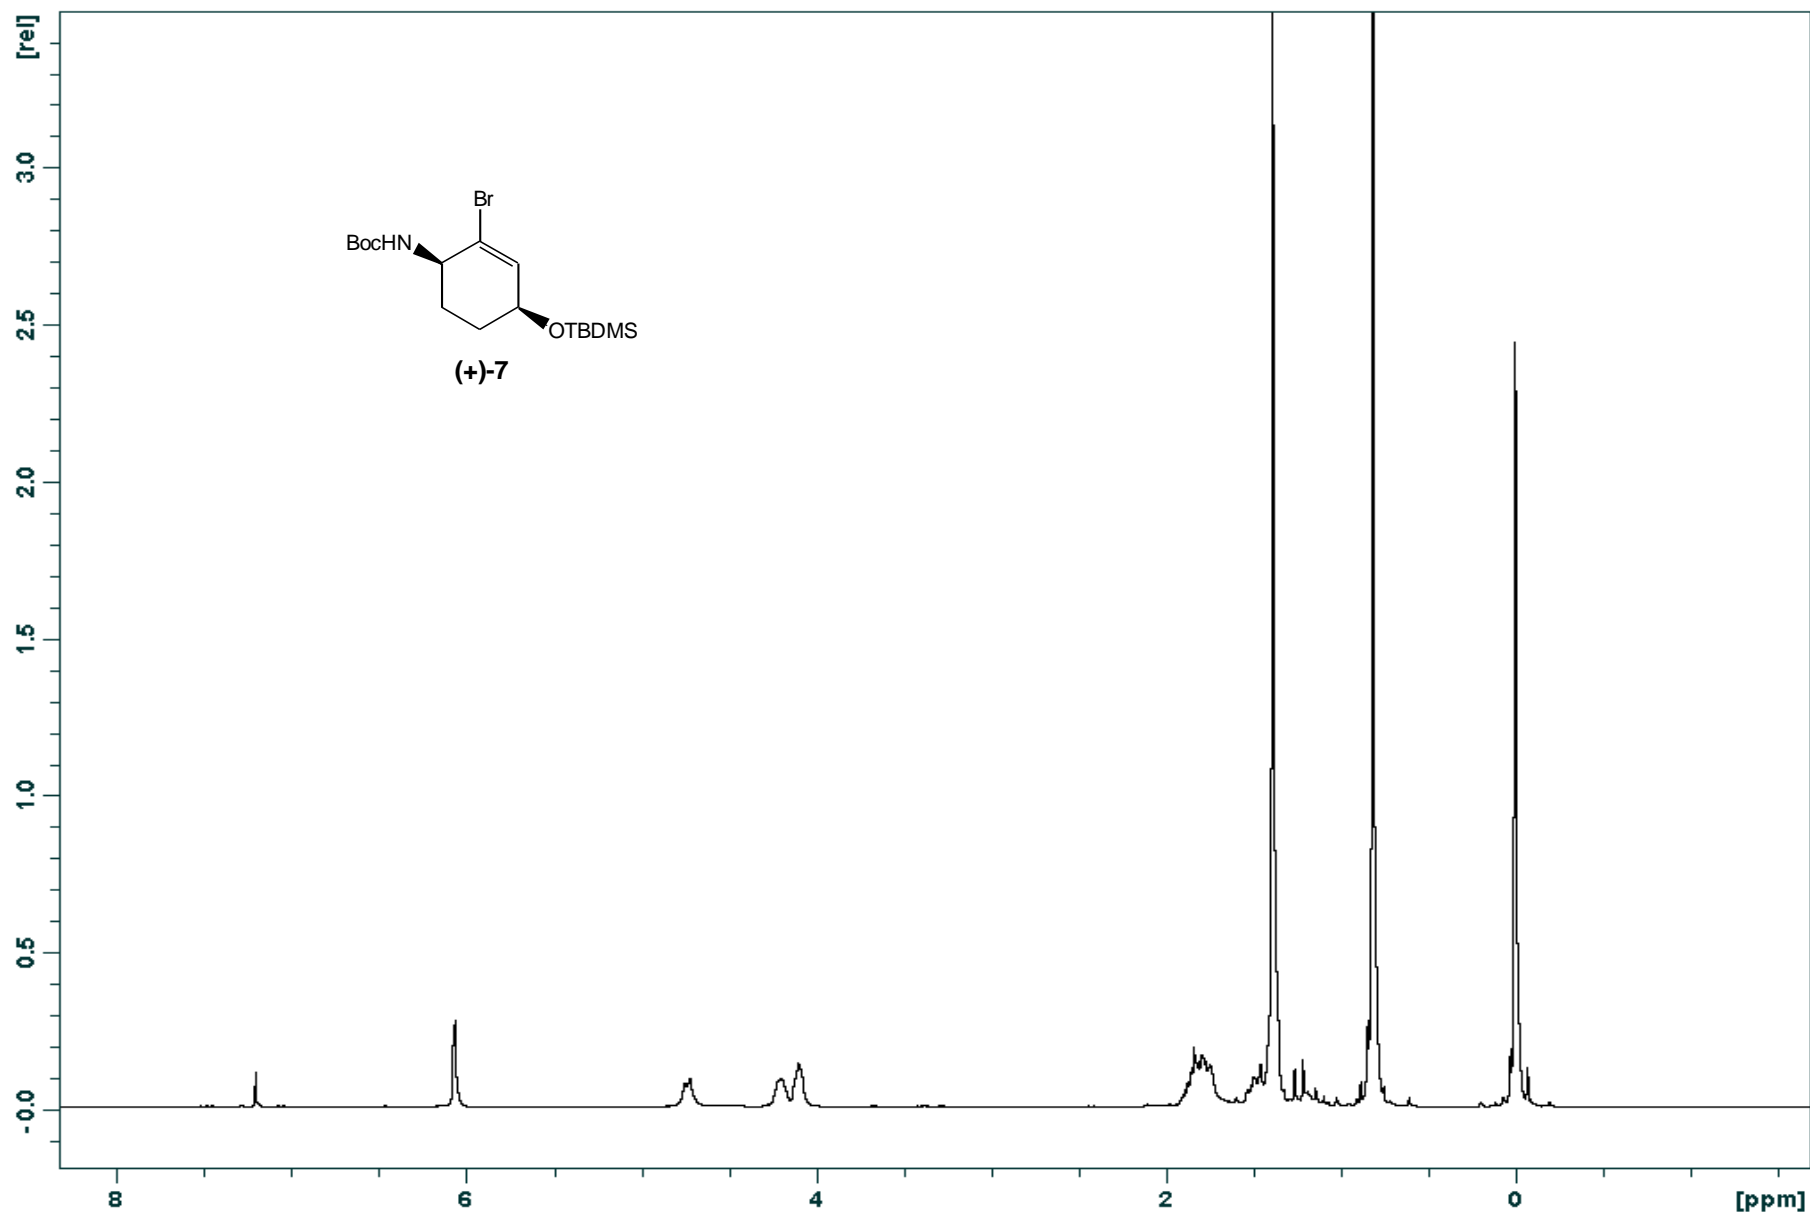

$^{13}\text{C}$ -NMR spectrum of compound (+)-7 in  $\text{CDCl}_3$

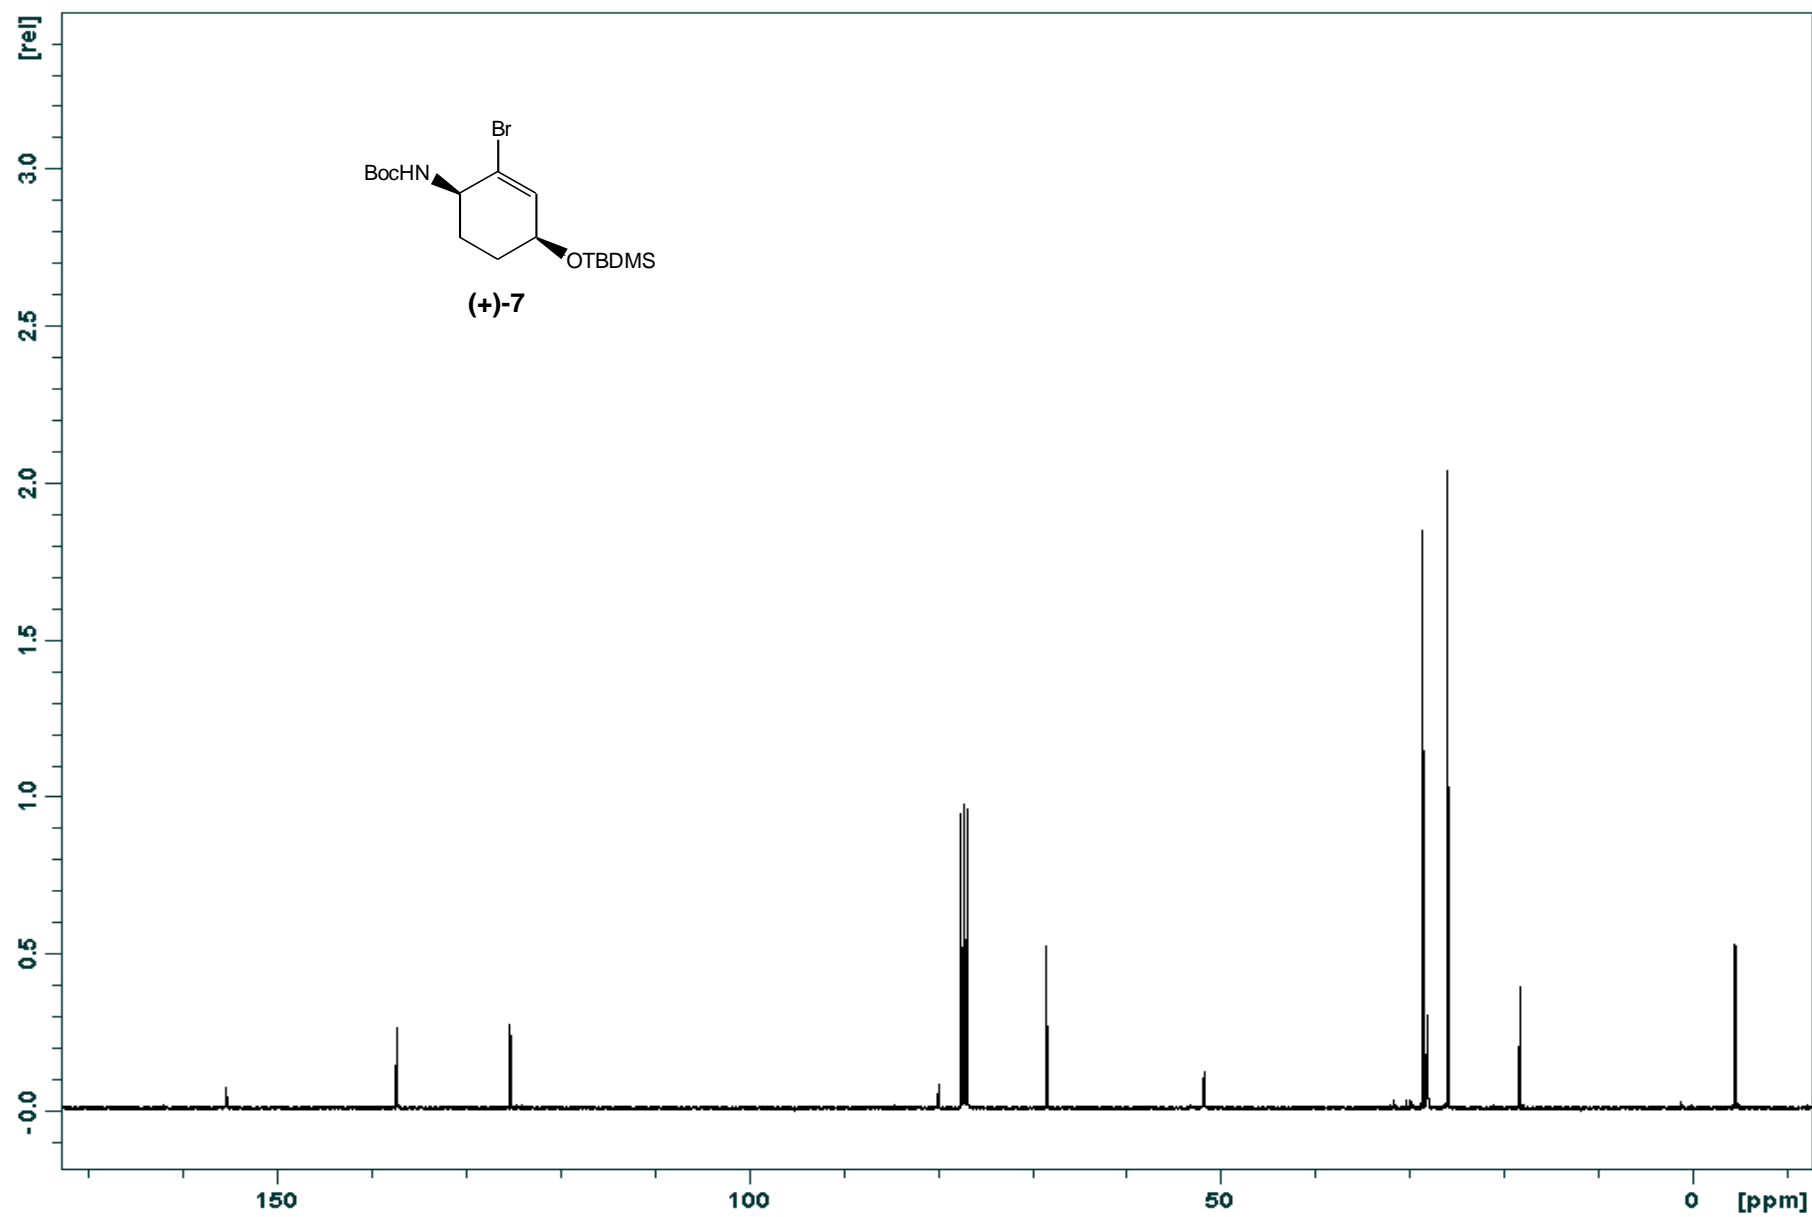

**<sup>1</sup>H-NMR spectrum of compound (+)-8 in CDCl<sub>3</sub>**

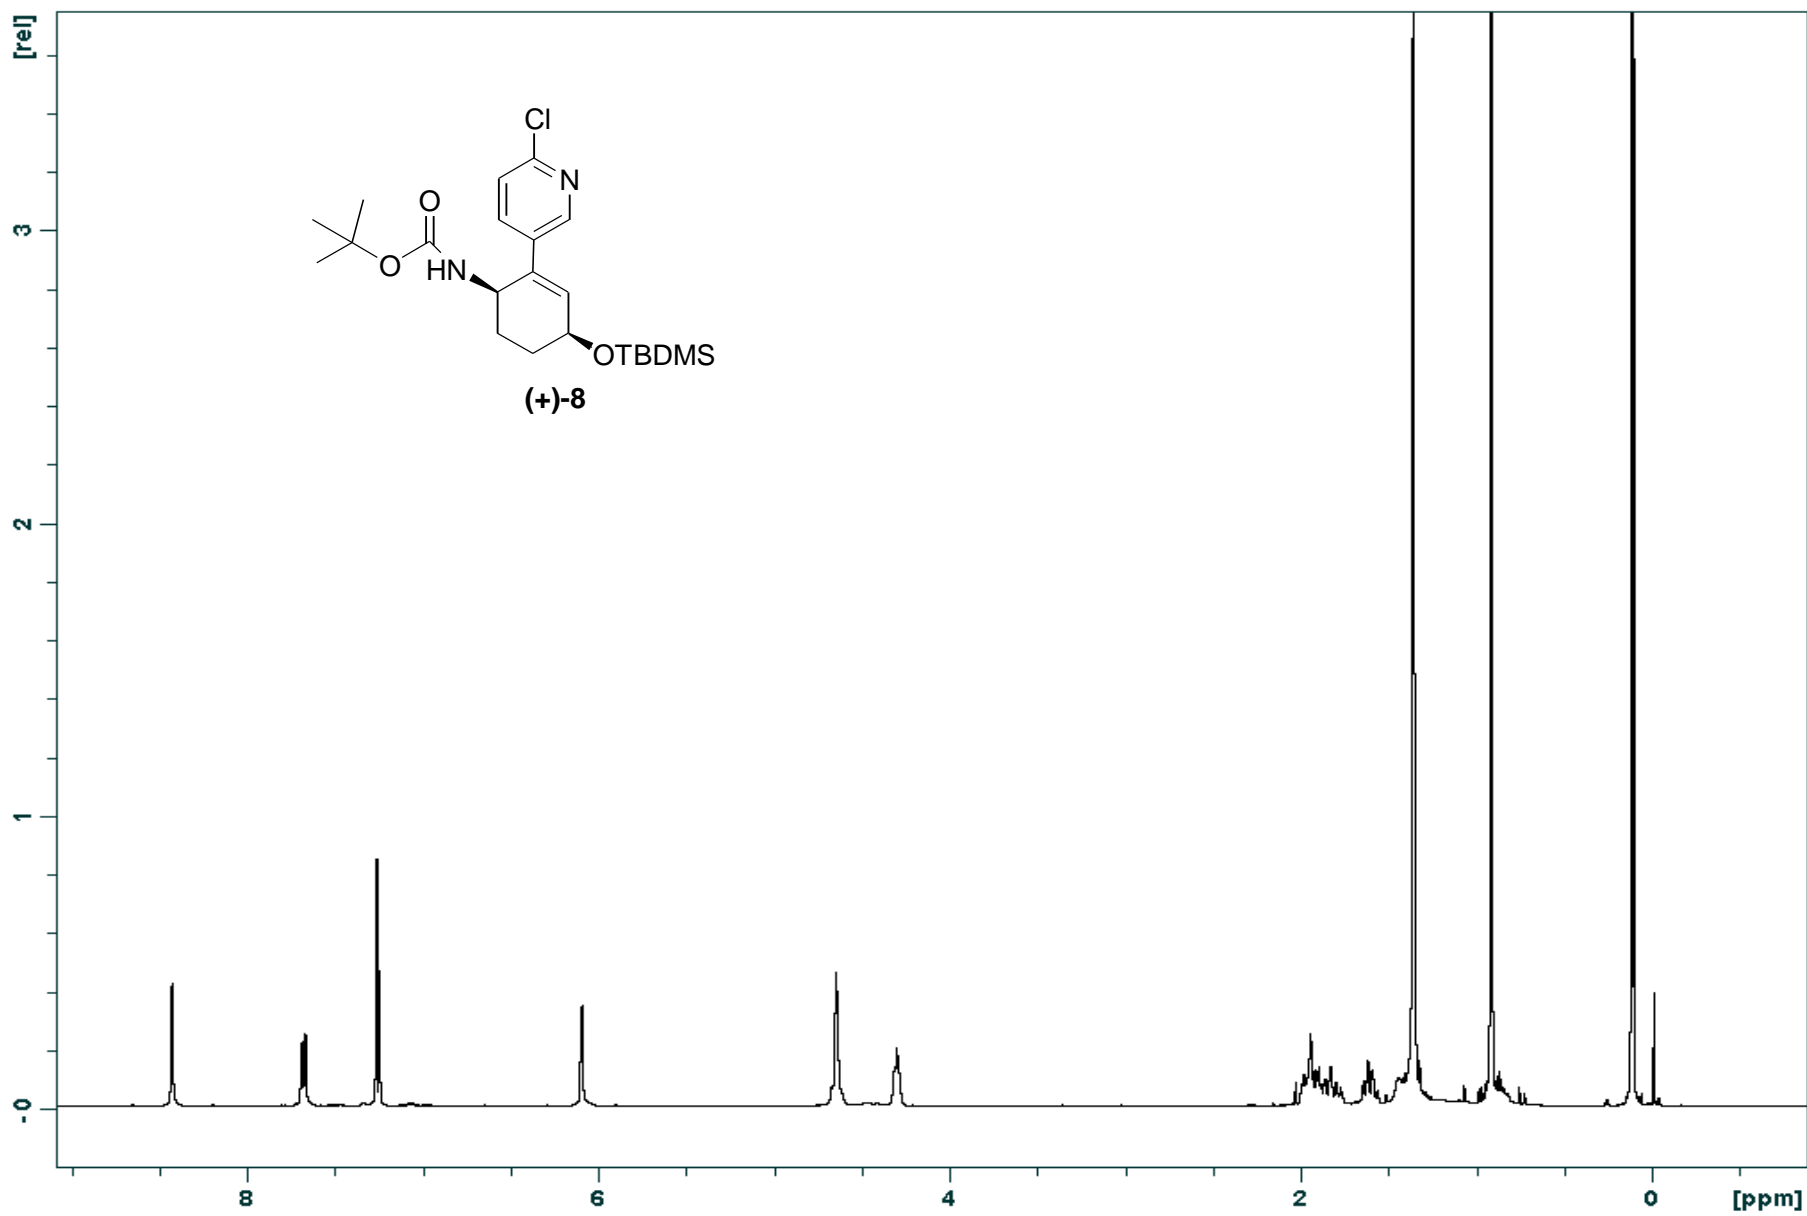



$^{13}\text{C}$ -NMR spectrum of compound (+)-8 in  $\text{CDCl}_3$

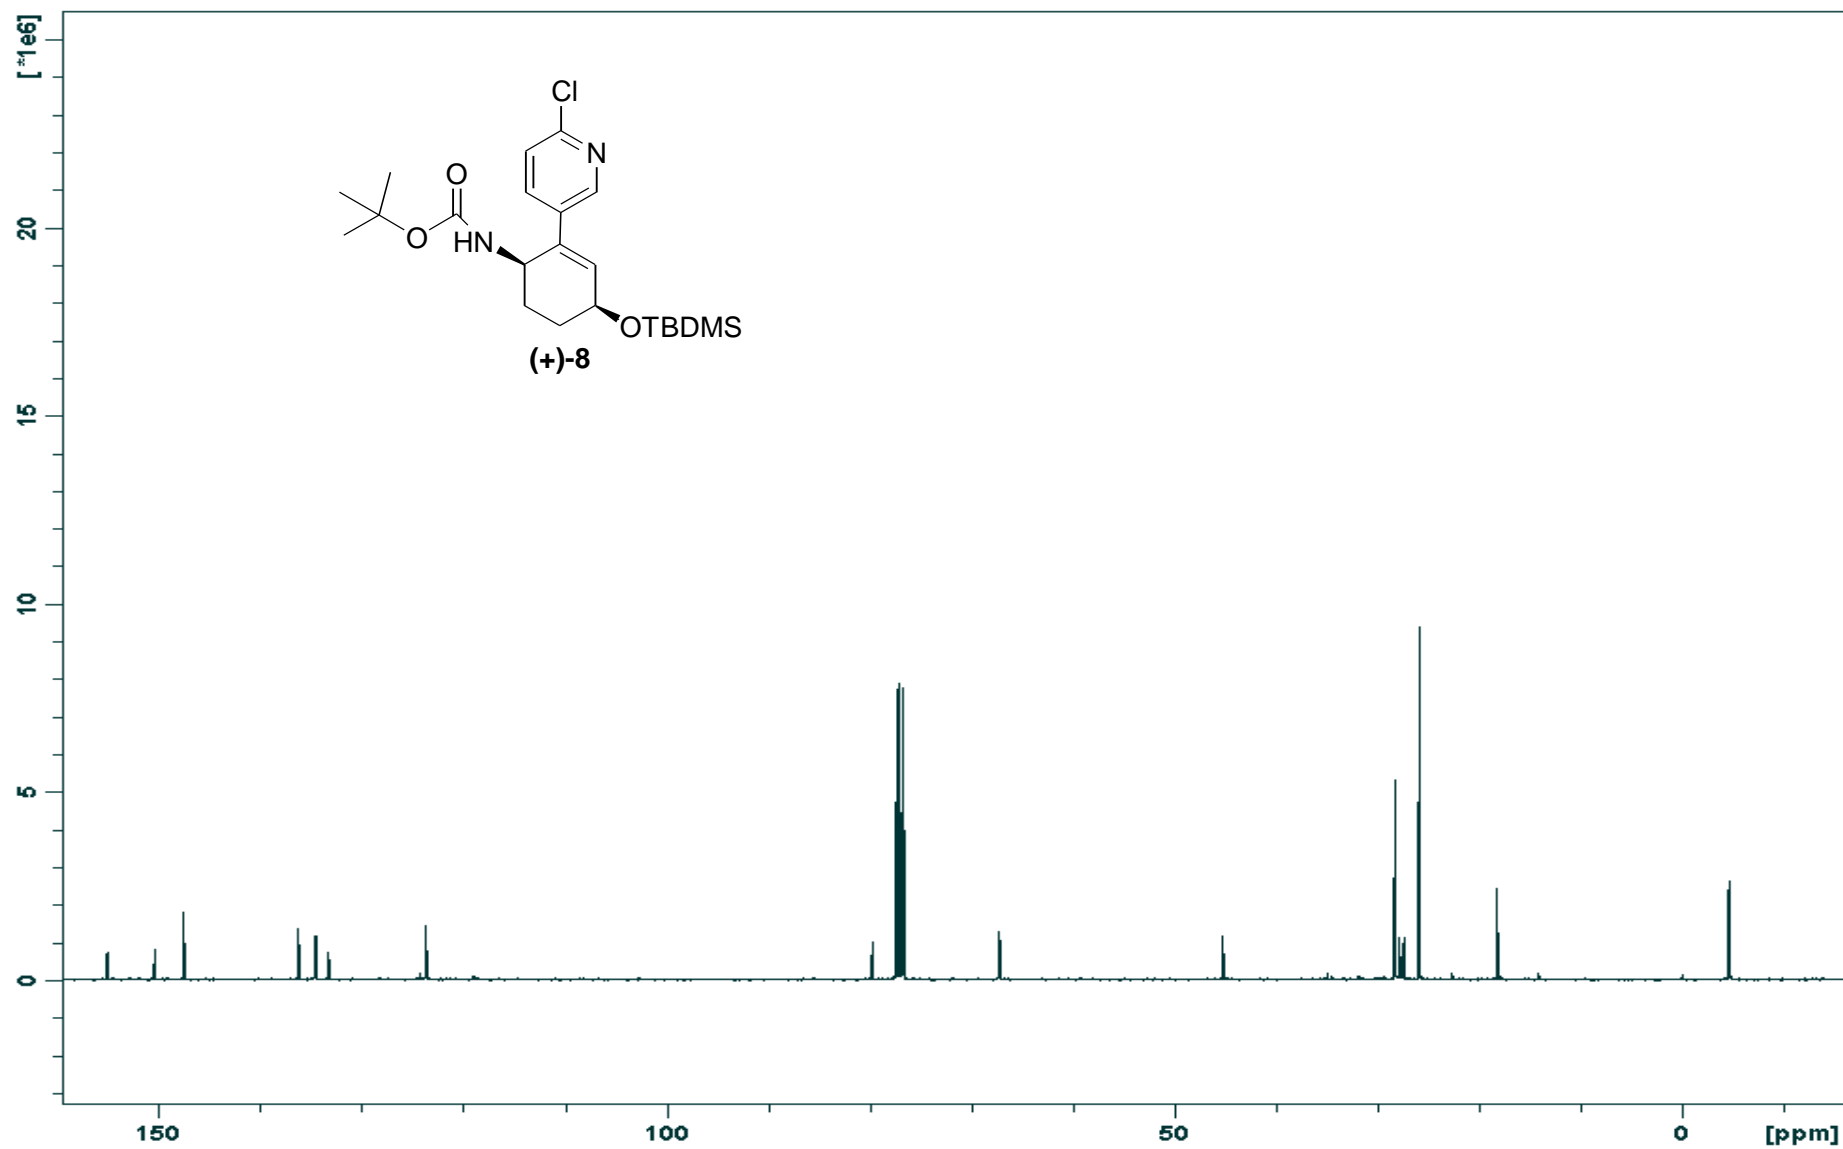

**<sup>1</sup>H-NMR spectrum of compound (+)-9 in CDCl<sub>3</sub>**

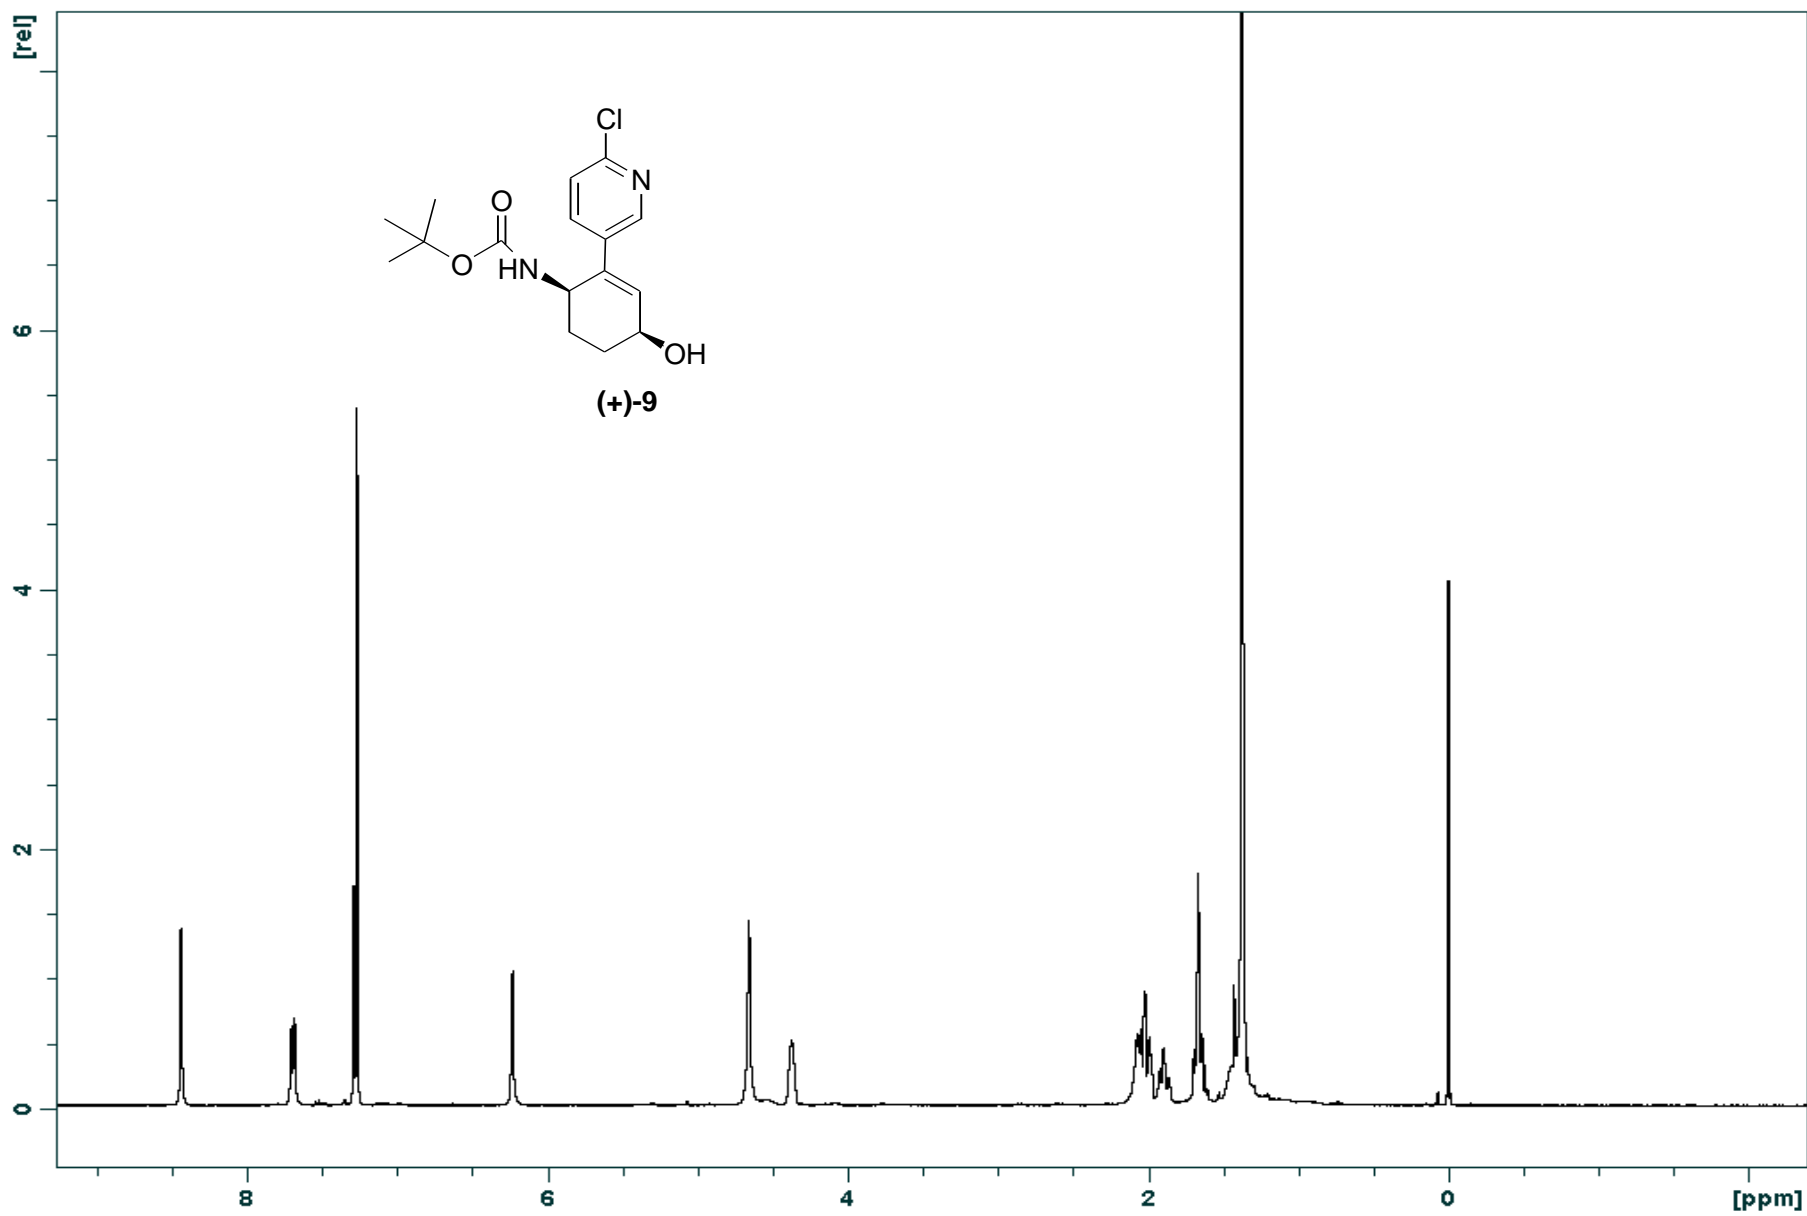

$^{13}\text{C}$ -NMR spectrum of compound (+)-9 in  $\text{CDCl}_3$

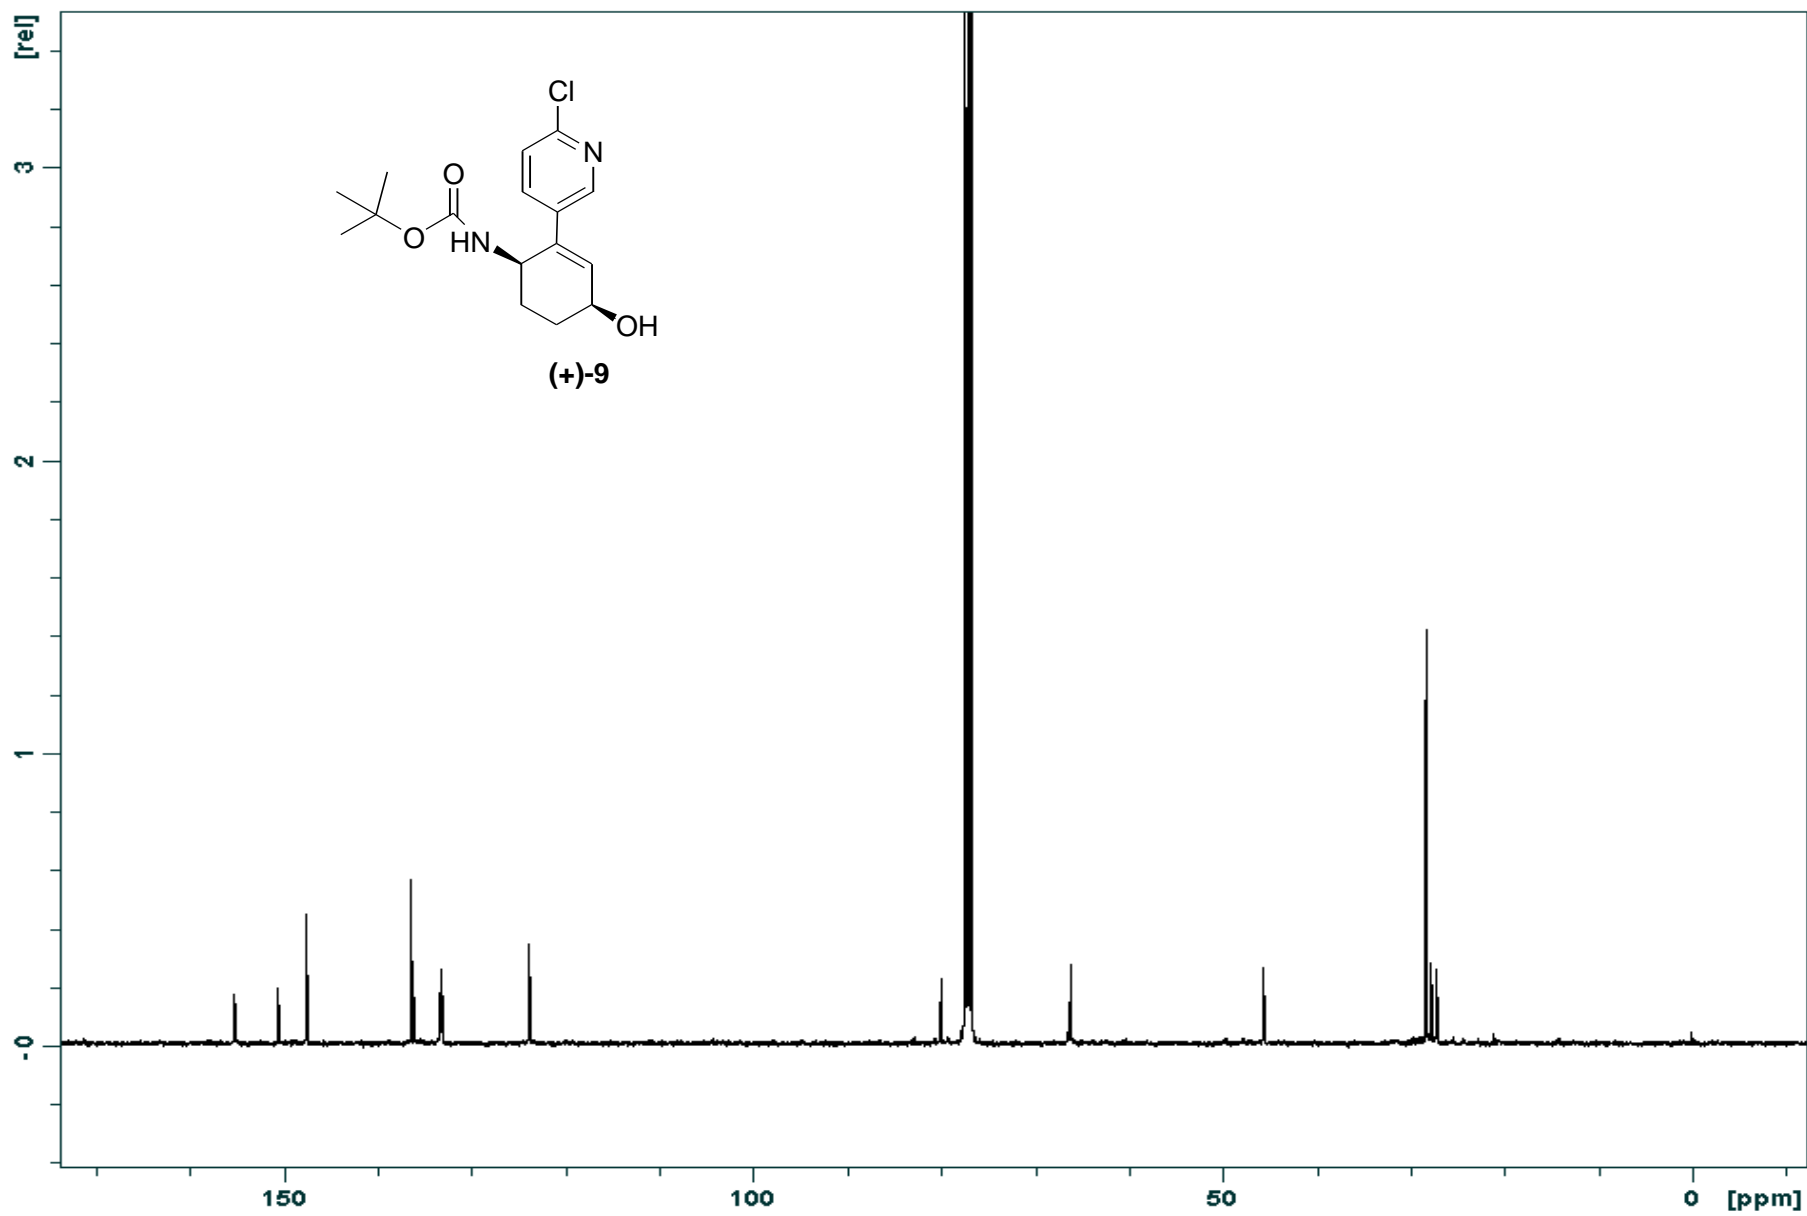

**<sup>1</sup>H-NMR spectrum of compound (-)-10 in CDCl<sub>3</sub>**

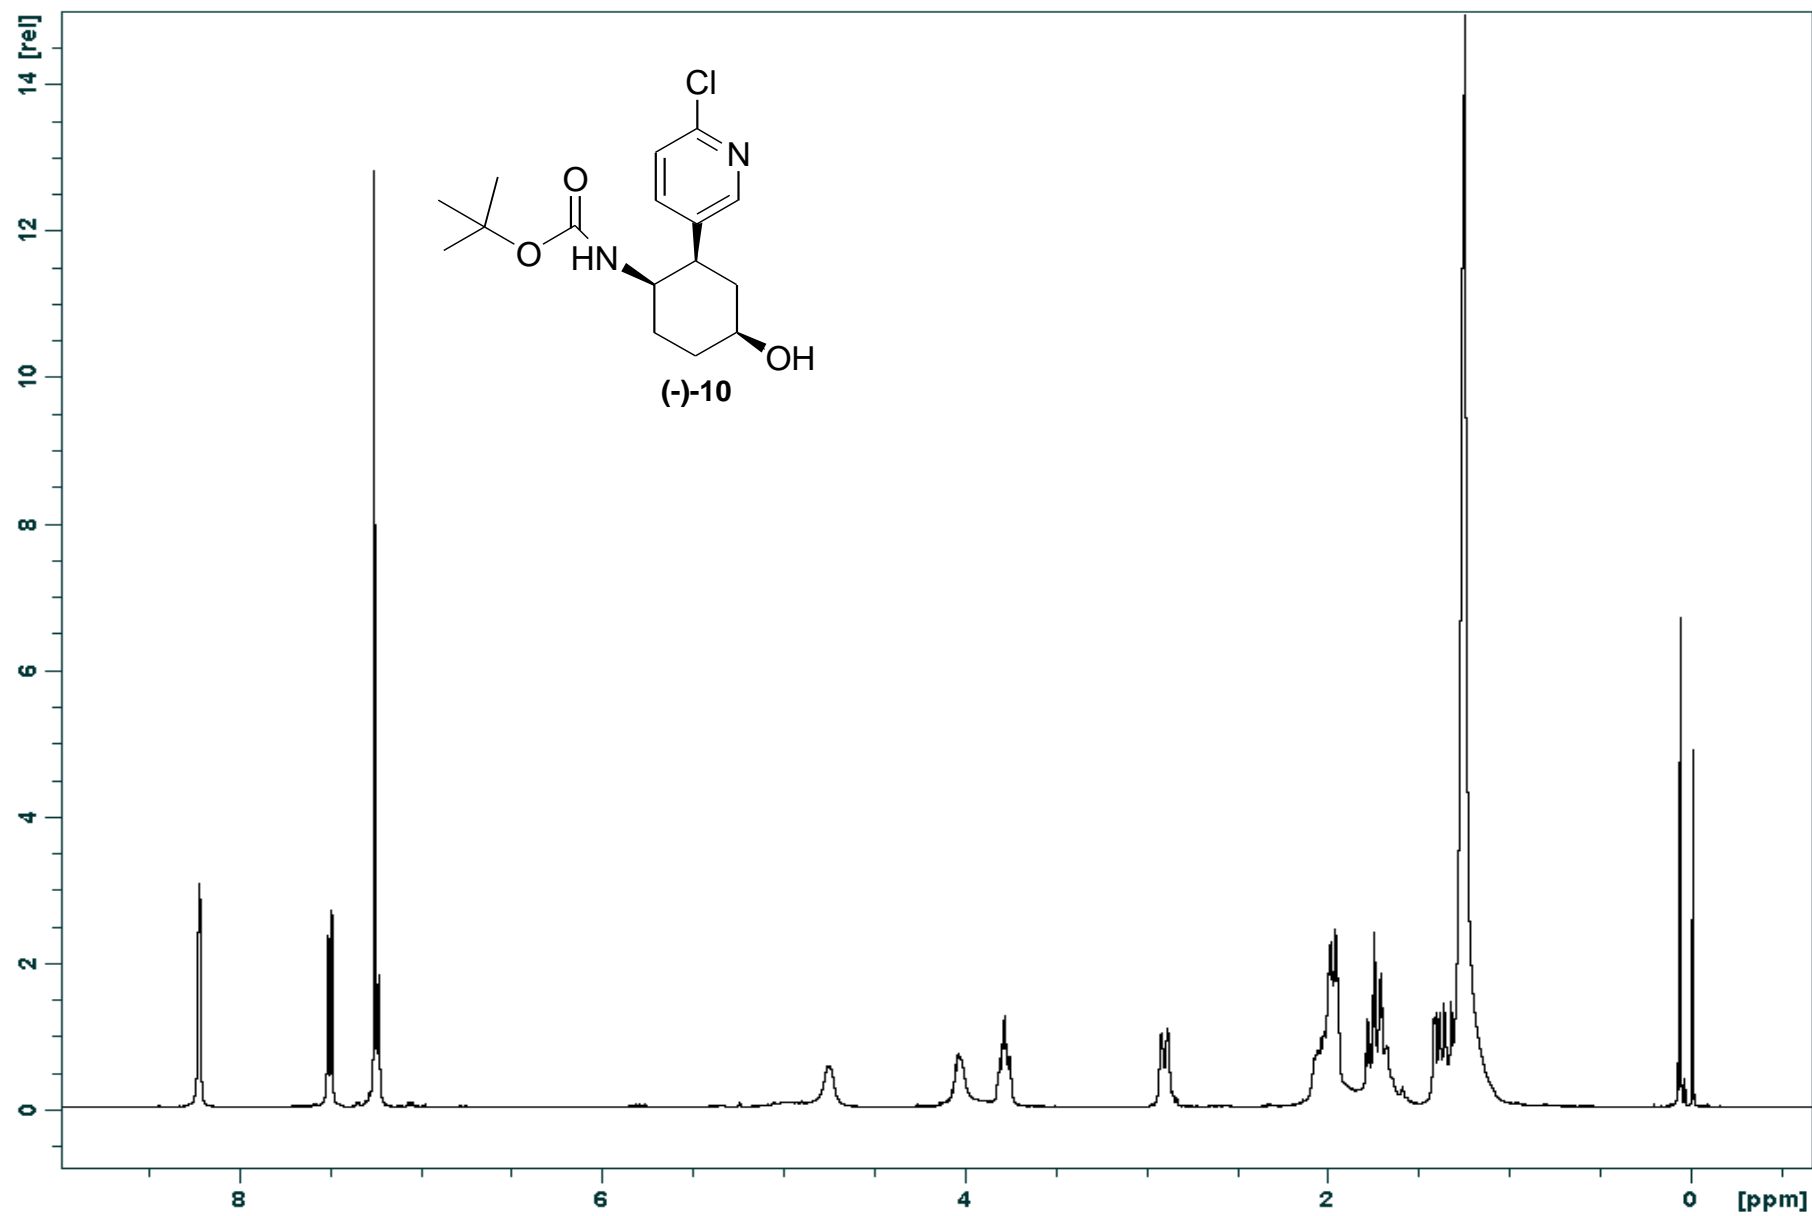

$^{13}\text{C}$ -NMR spectrum of compound (-)-10 in  $\text{CDCl}_3$

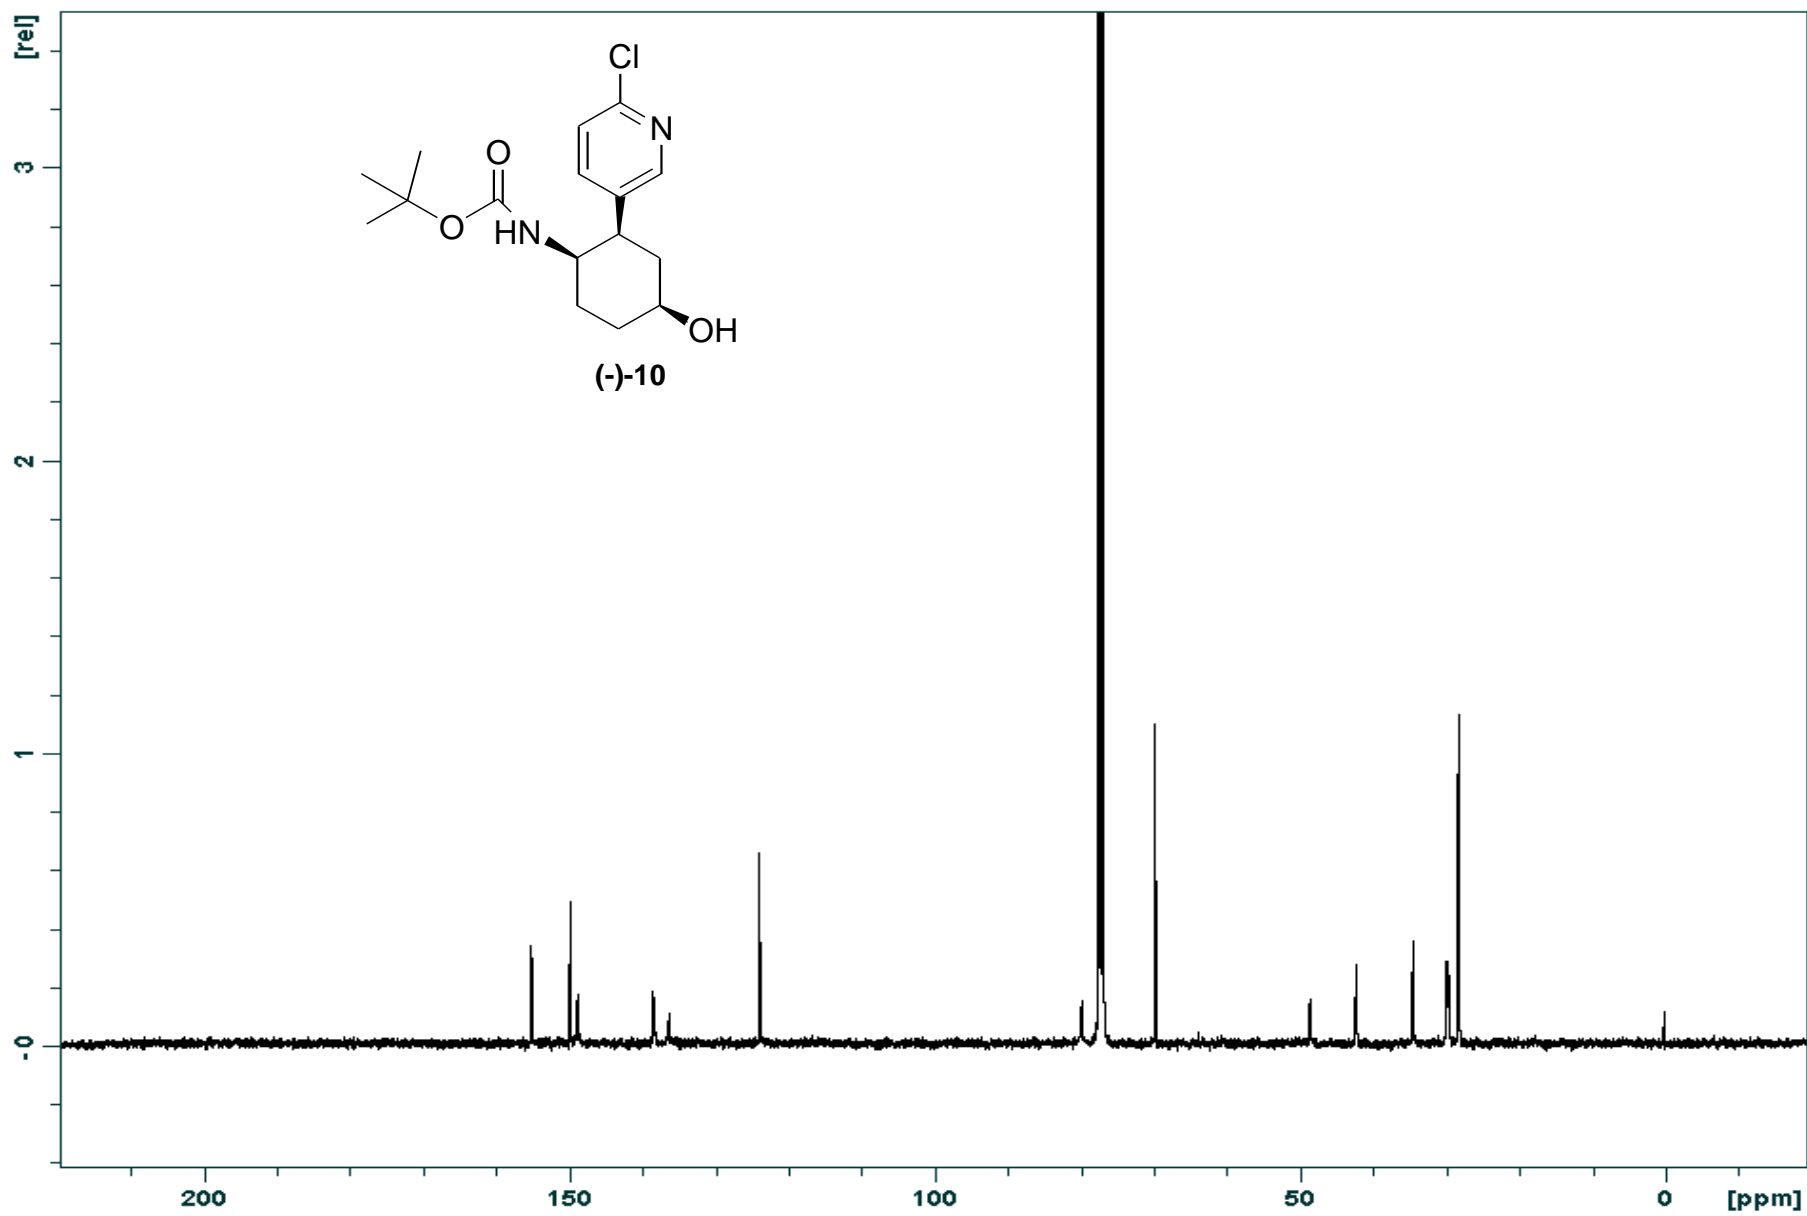

**<sup>1</sup>H-NMR spectrum of compound (-)-11 in CDCl<sub>3</sub>**

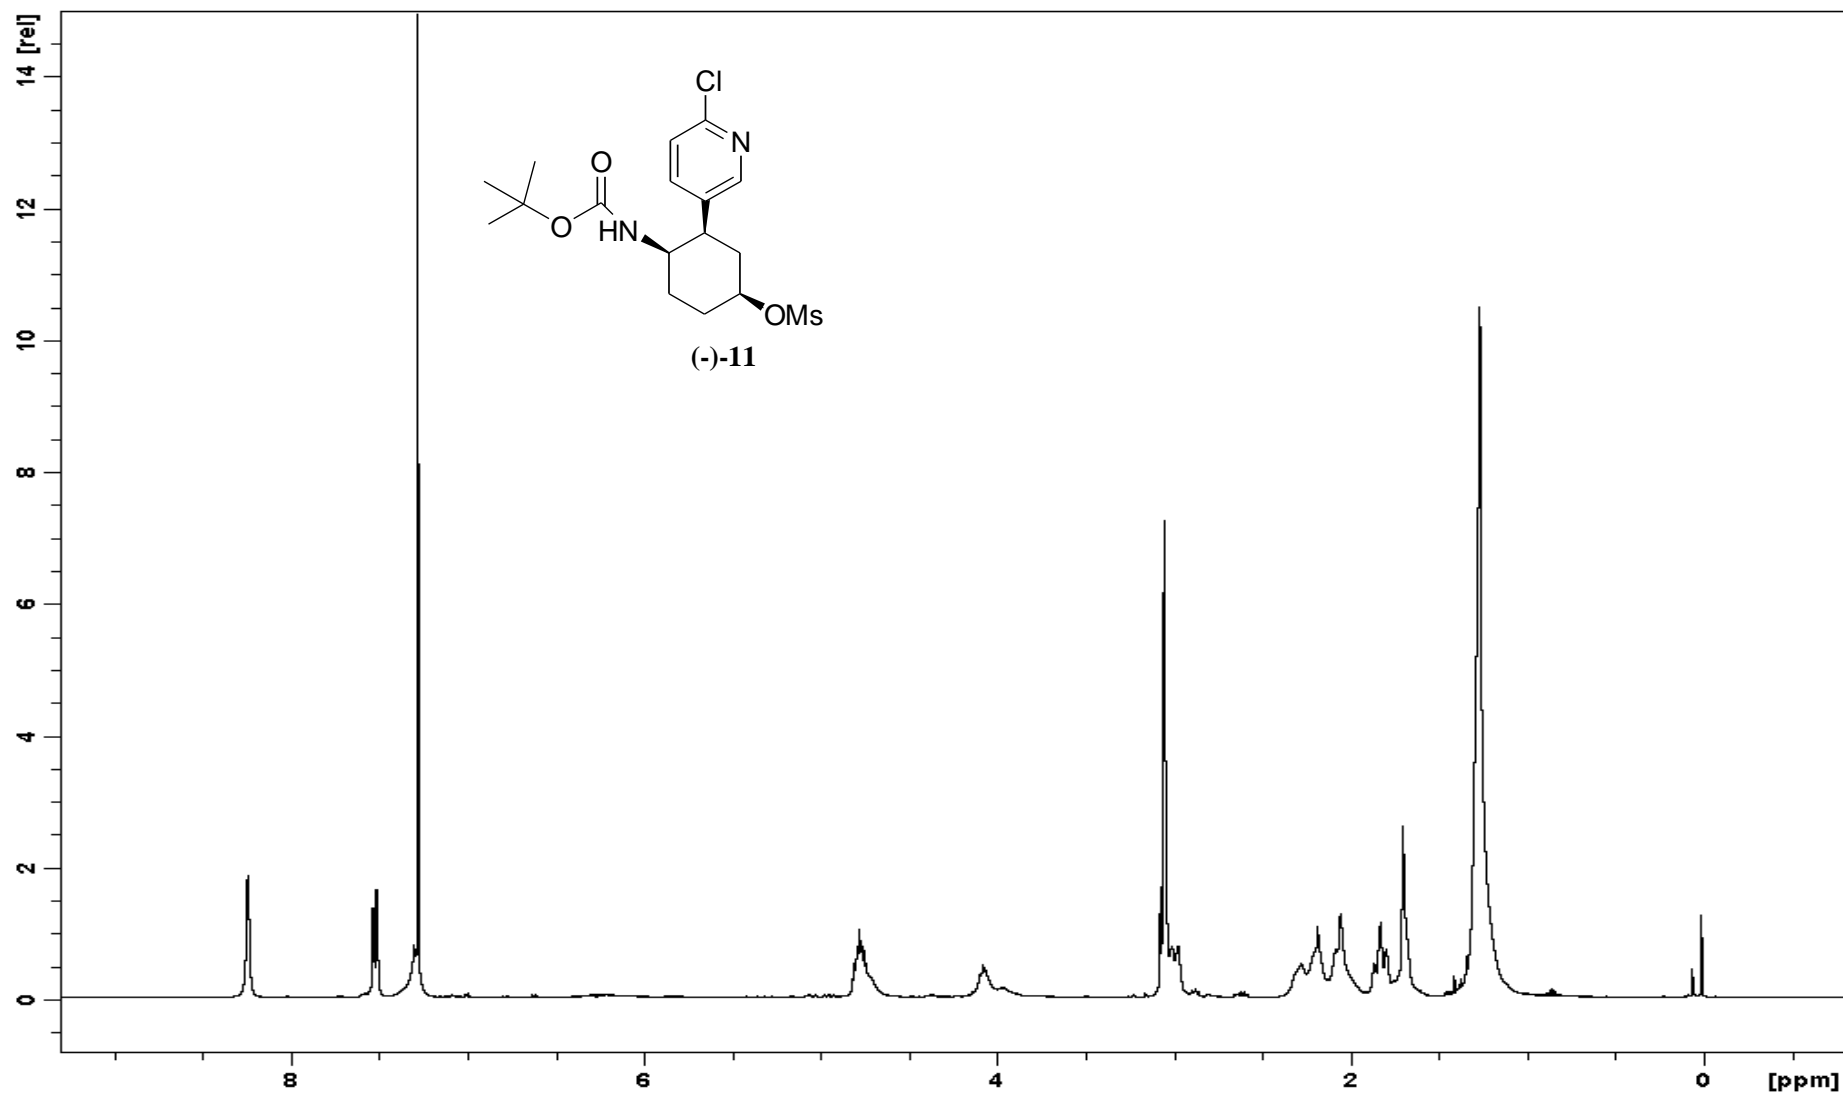

$^{13}\text{C}$ -NMR spectrum of compound (-)-11 in  $\text{CDCl}_3$

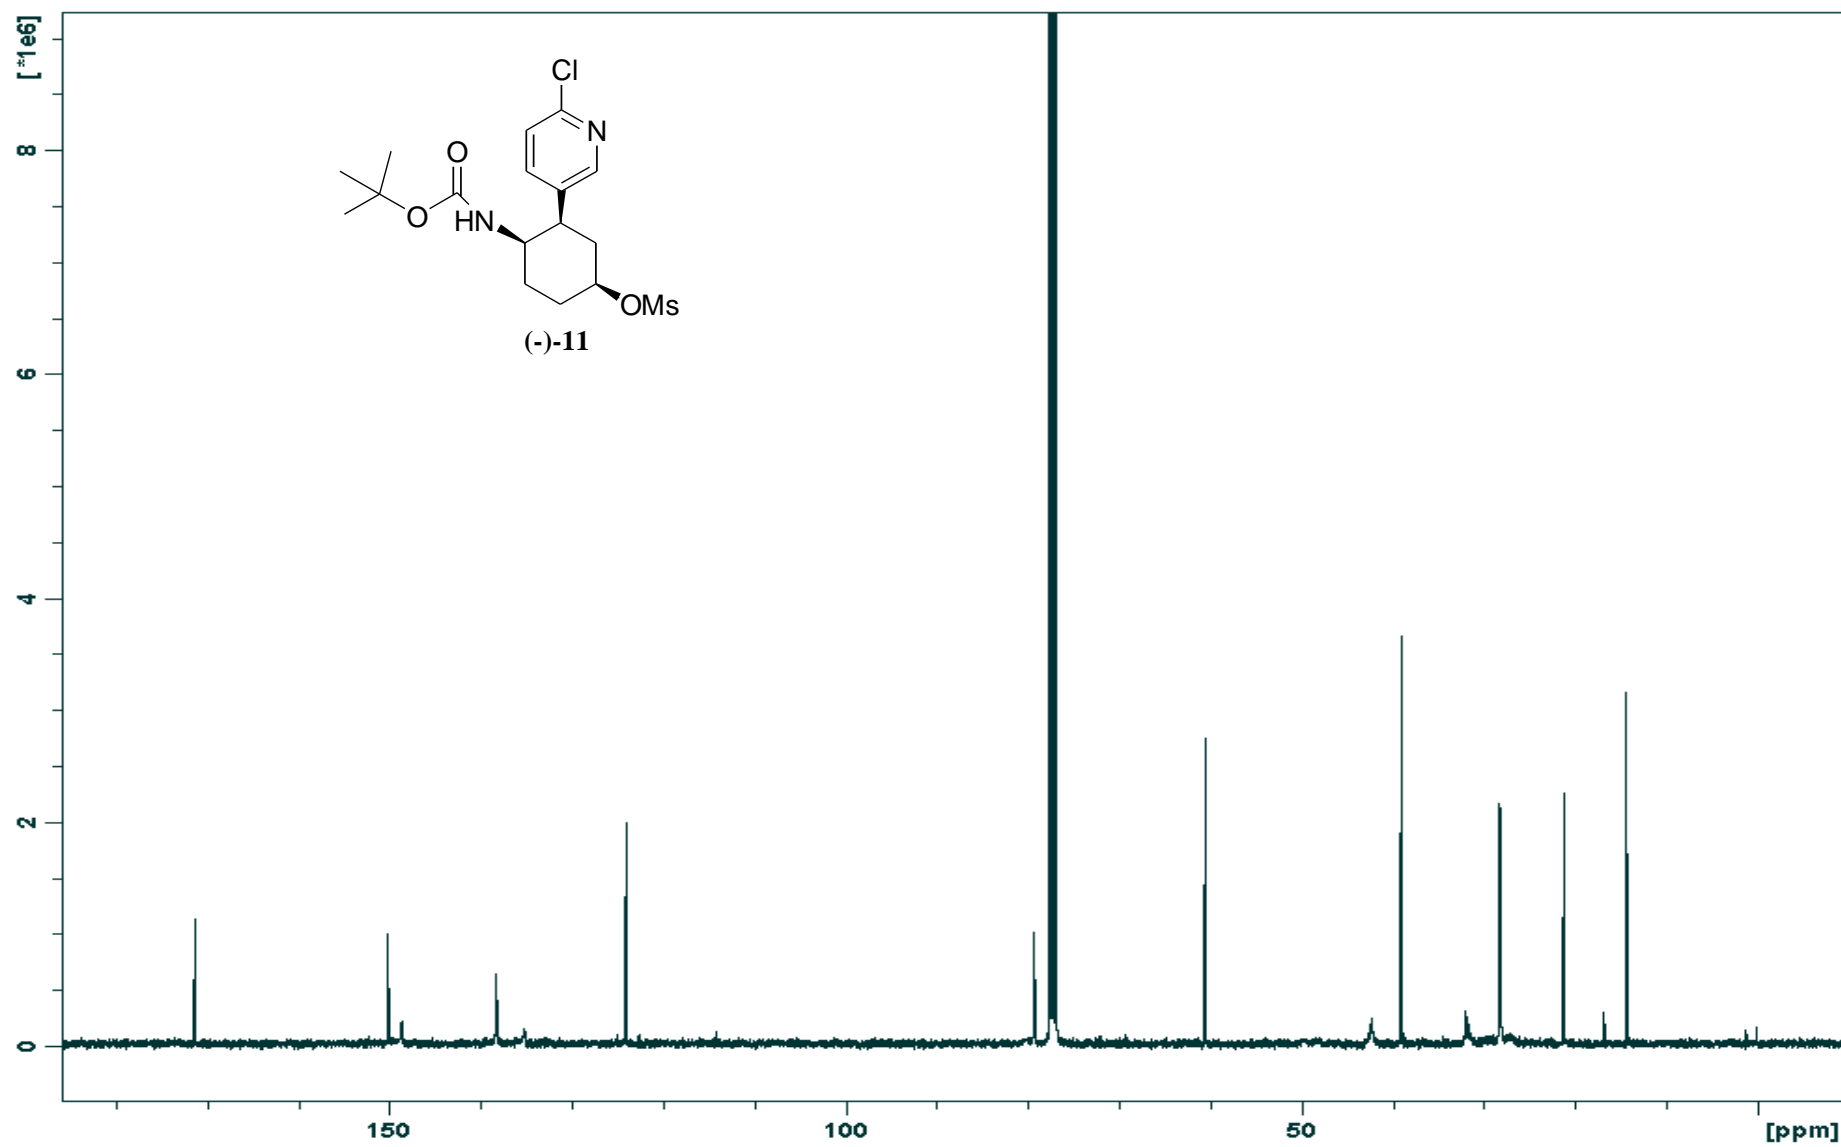

**$^1\text{H-NMR}$  spectrum of compound (-)-12 in  $\text{CDCl}_3$**

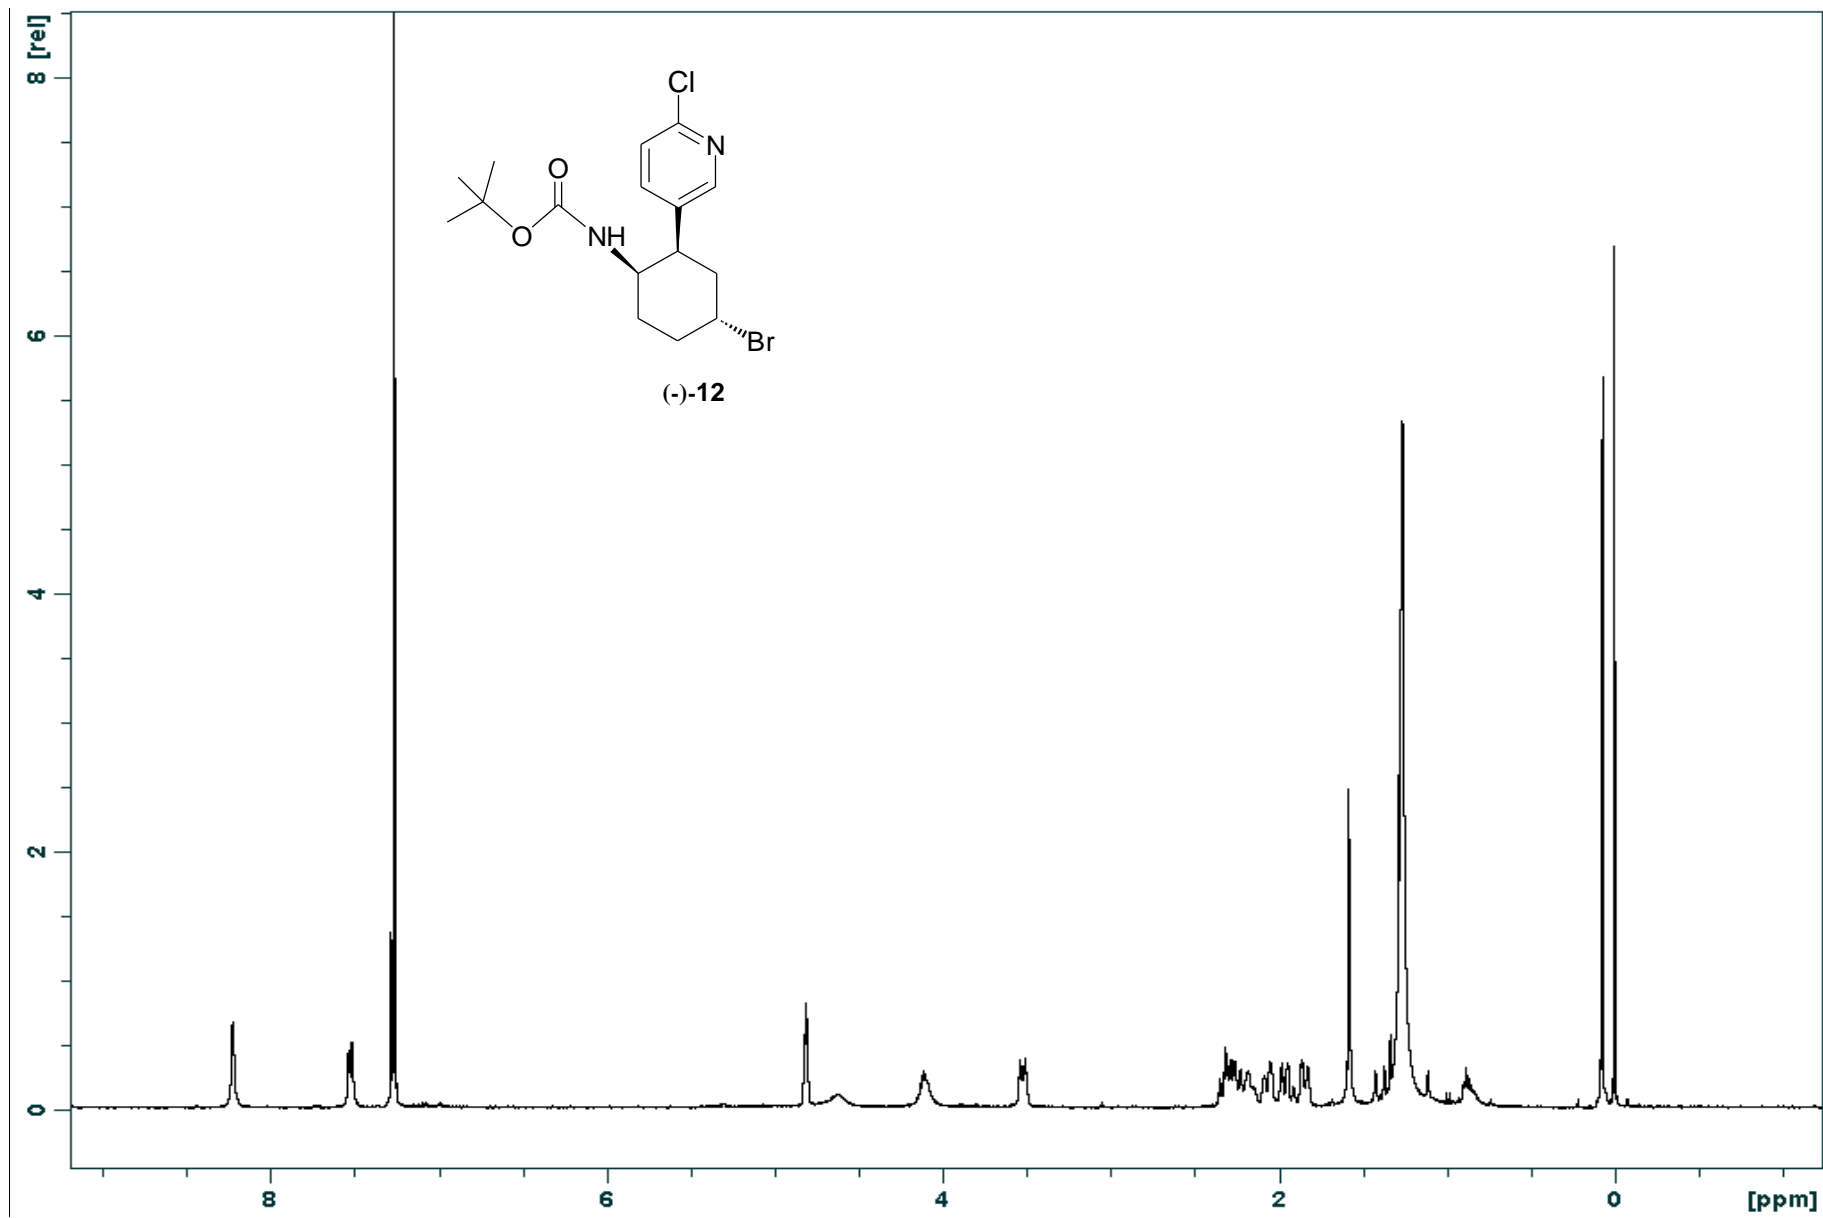



$^{13}\text{C}$ -NMR spectrum of compound (-)-12 in  $\text{CDCl}_3$

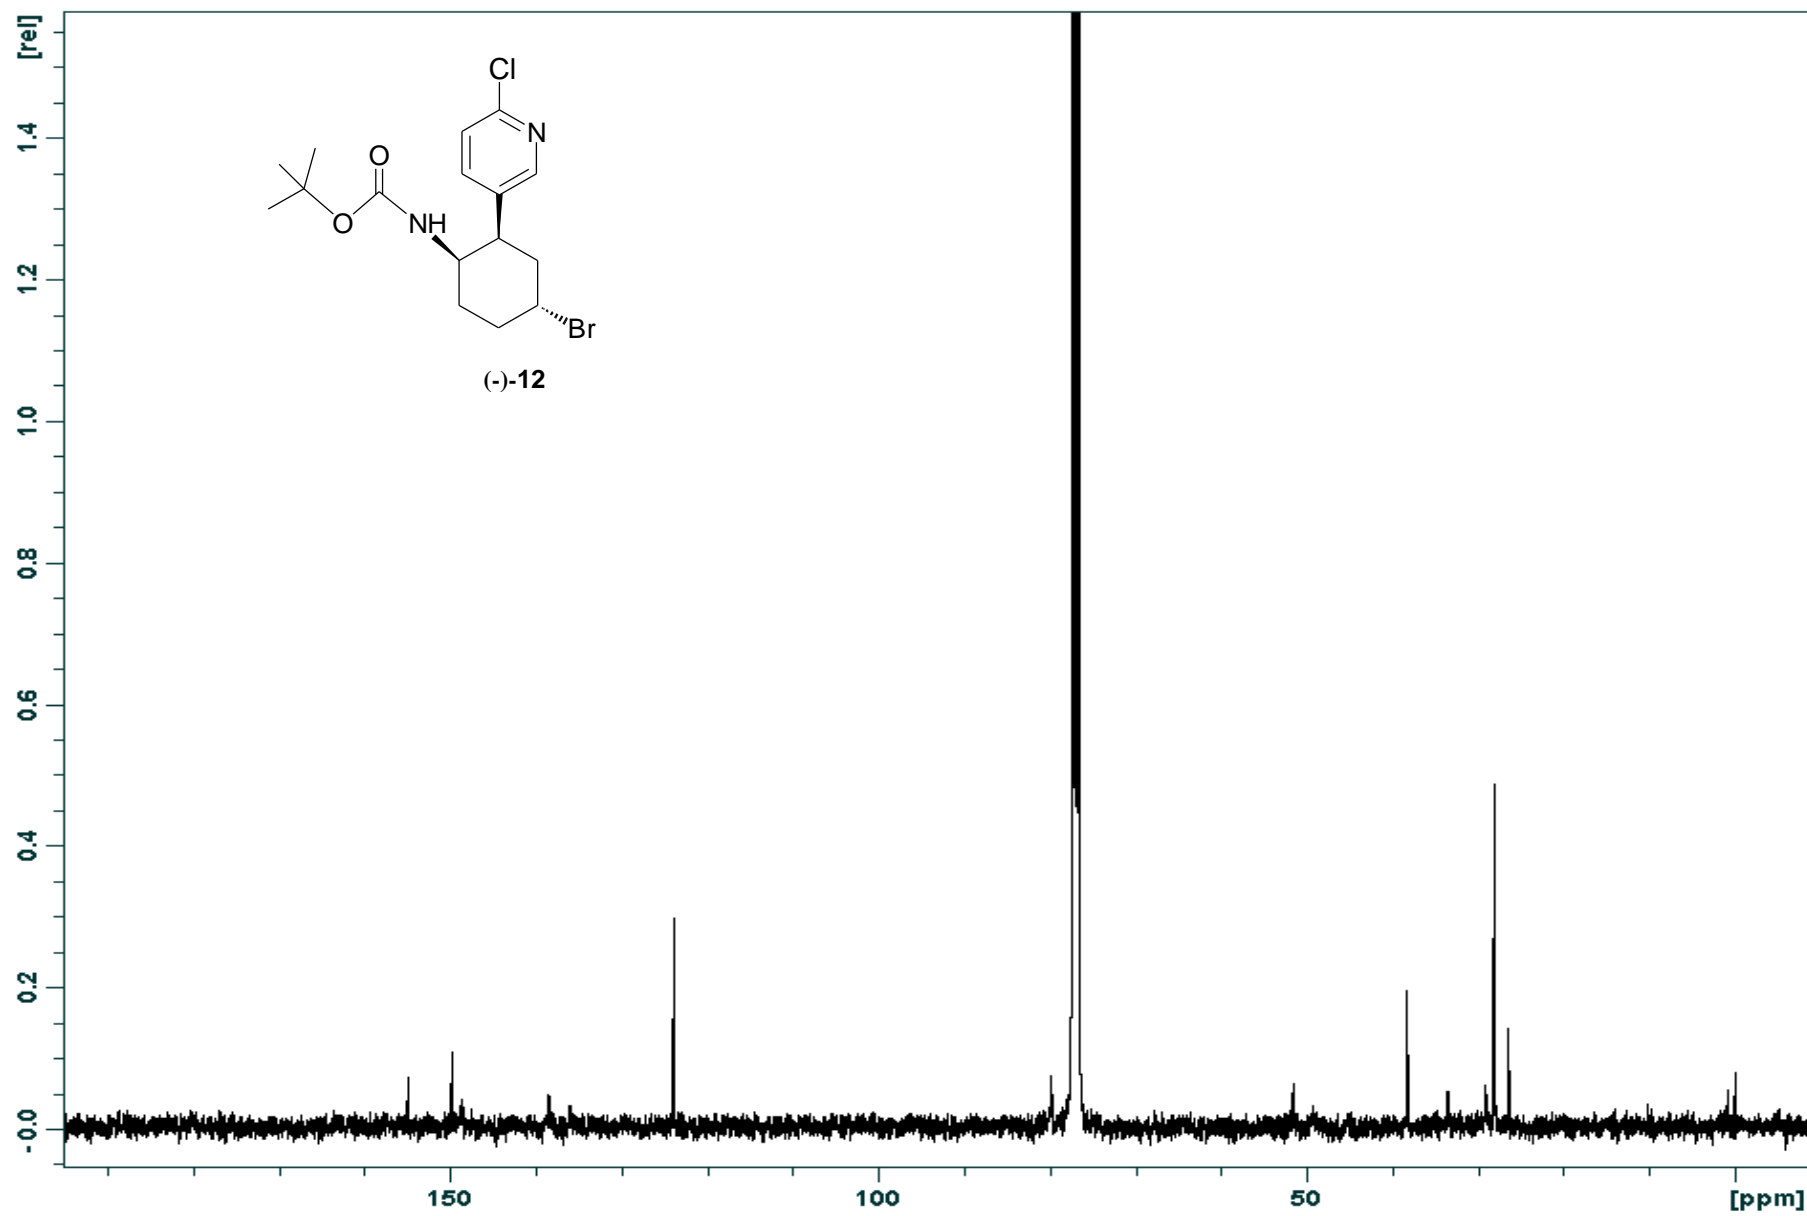

**$^1\text{H-NMR}$  spectrum of compound 13 in  $\text{CDCl}_3$  (crude)**

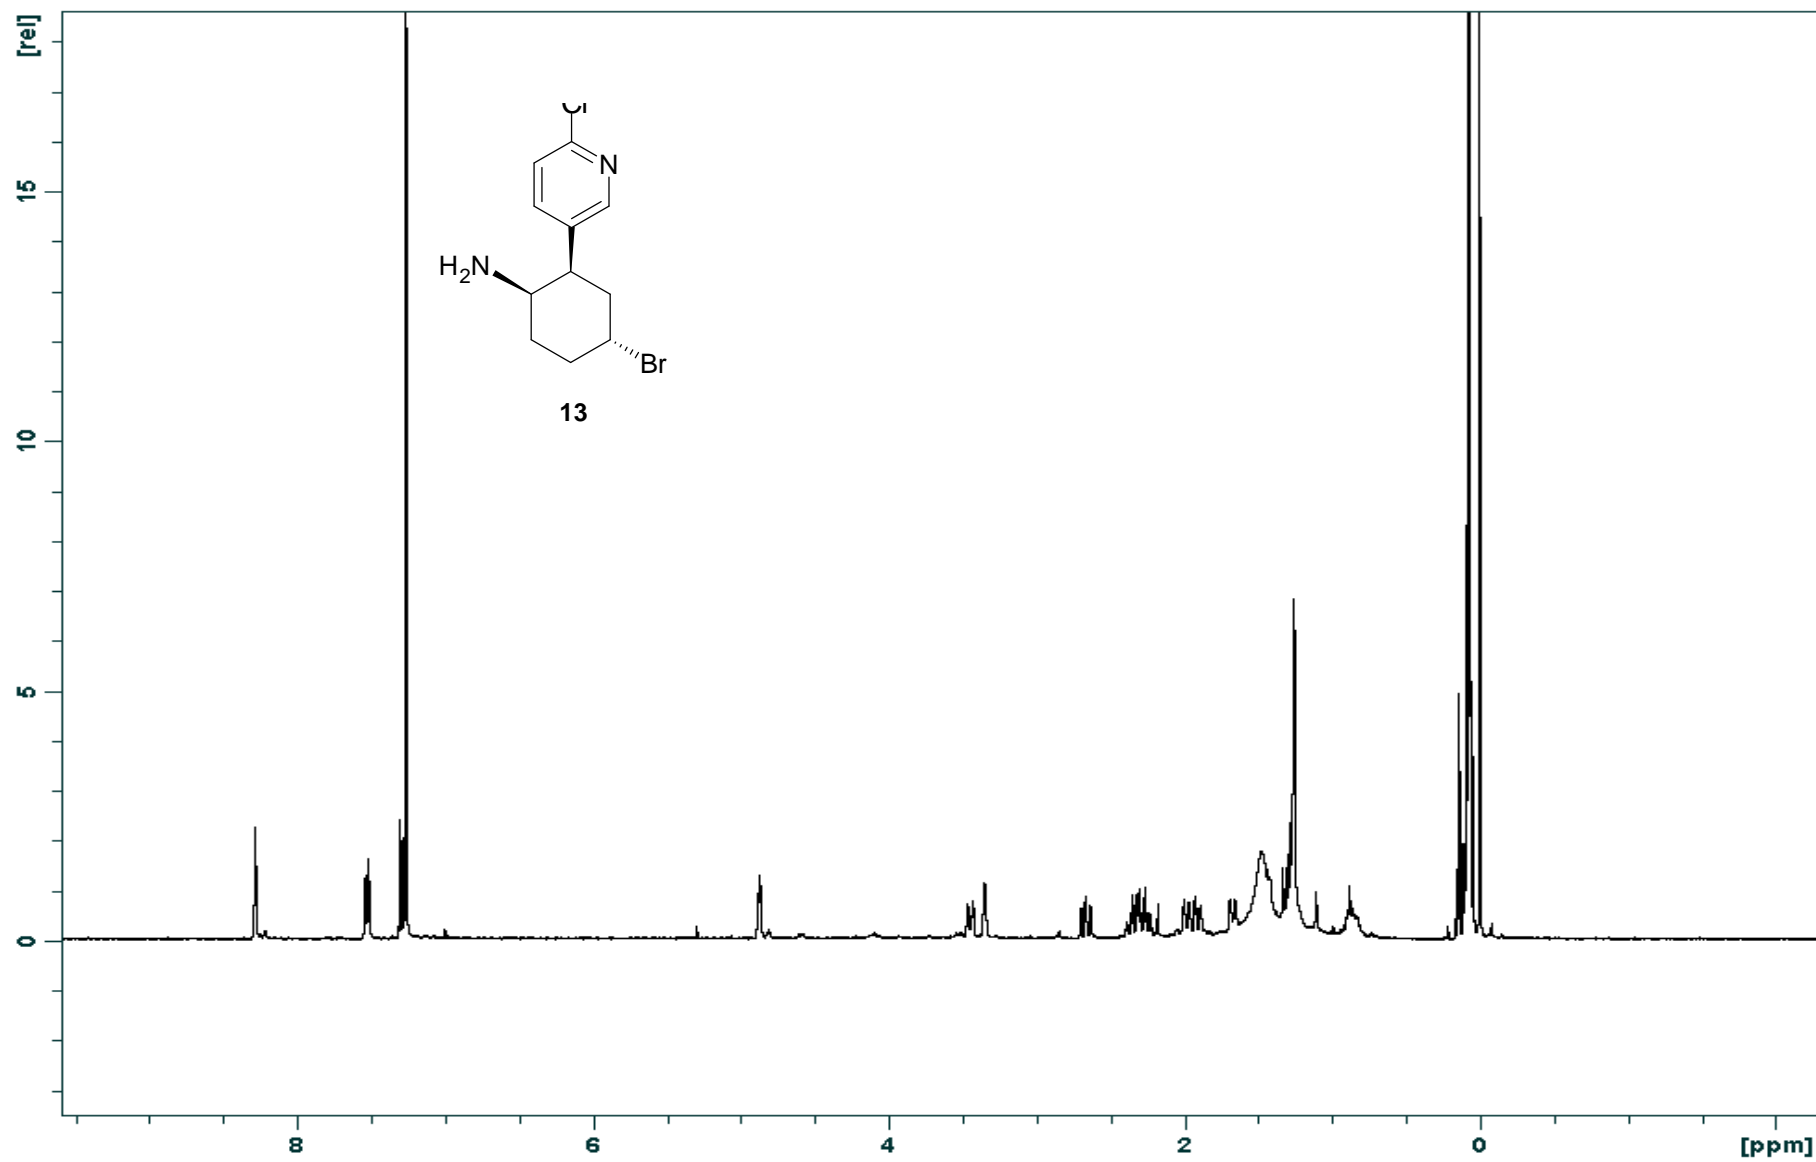

$^{13}\text{C}$ -NMR spectrum of compound **13** in  $\text{CDCl}_3$  (crude)

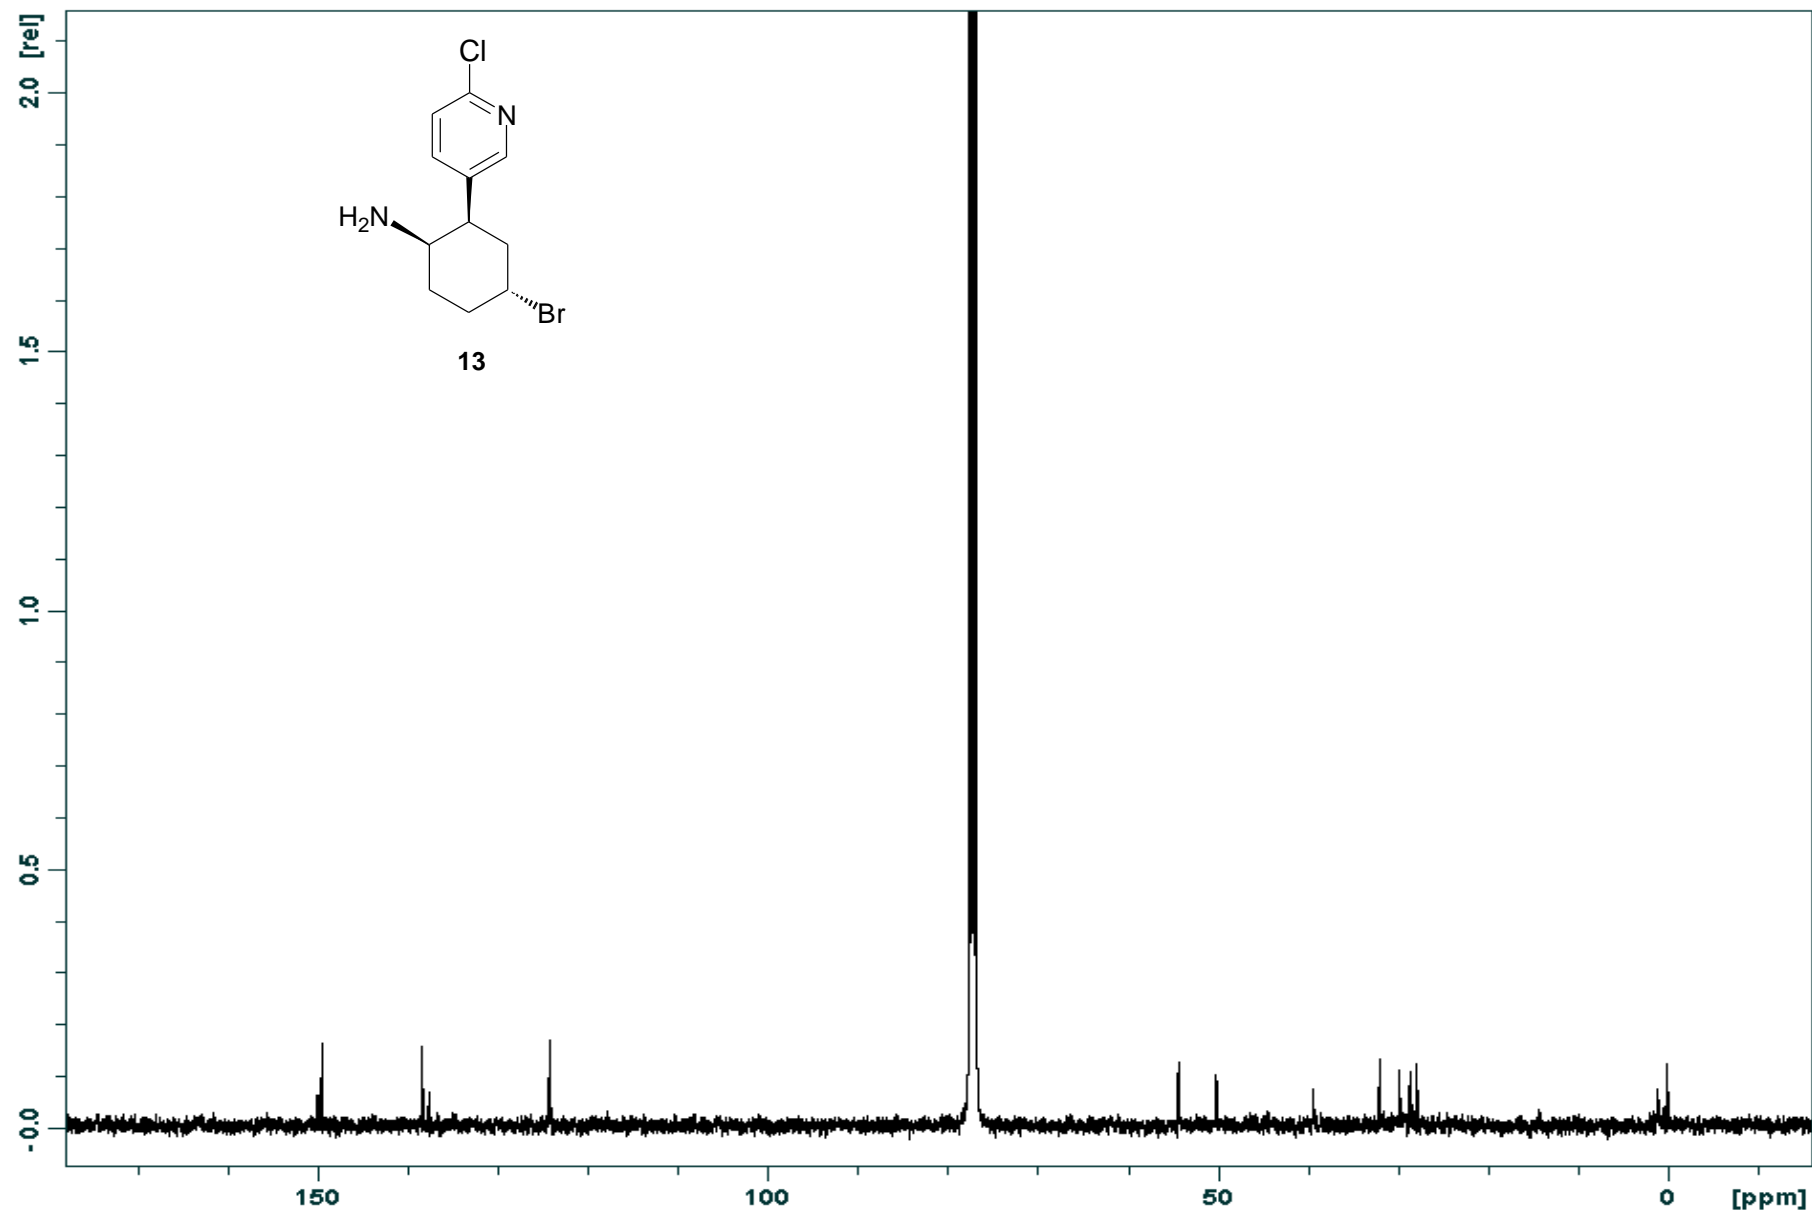

**<sup>1</sup>H-NMR spectrum of (-)-epibatidine in CDCl<sub>3</sub>**

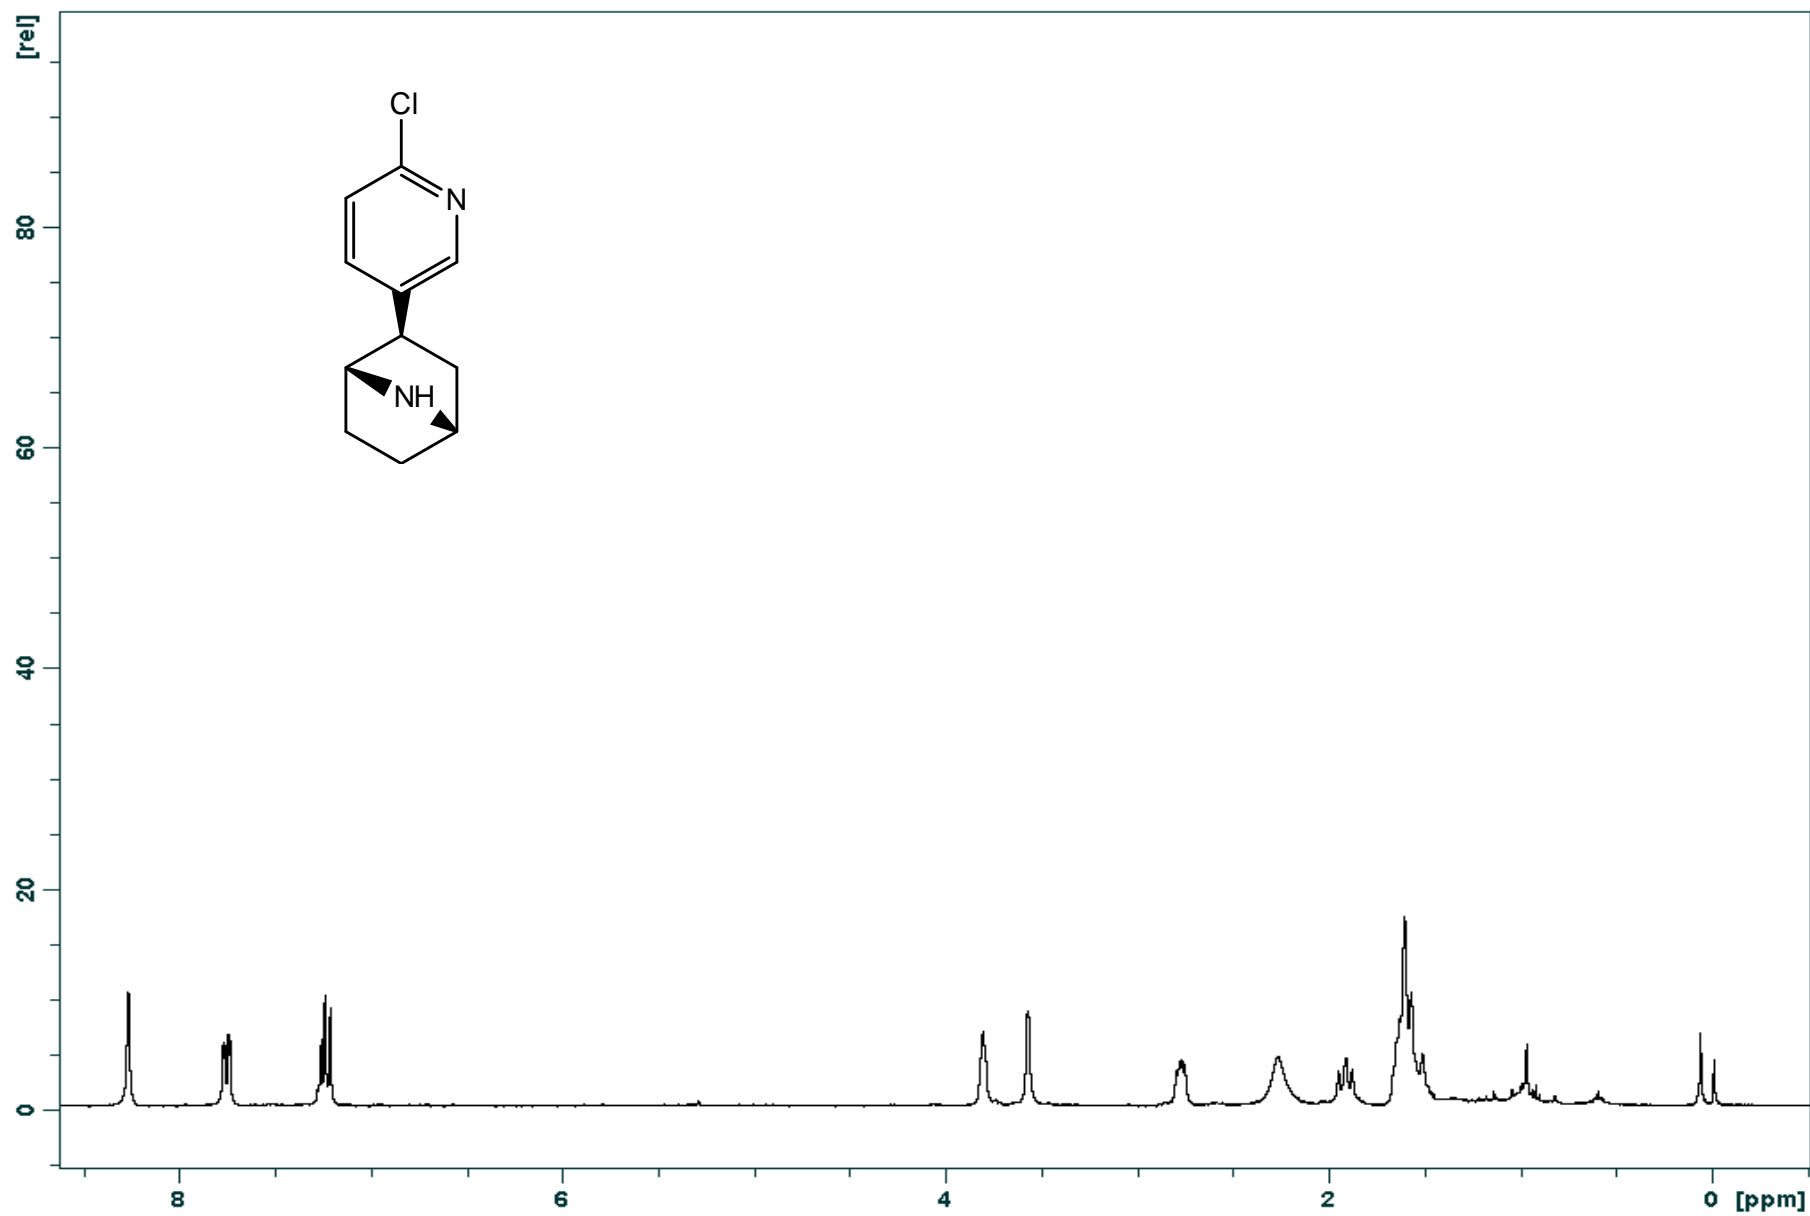

**$^{13}\text{C}$ -NMR spectrum of (-)-epibatidine in  $\text{CDCl}_3$**

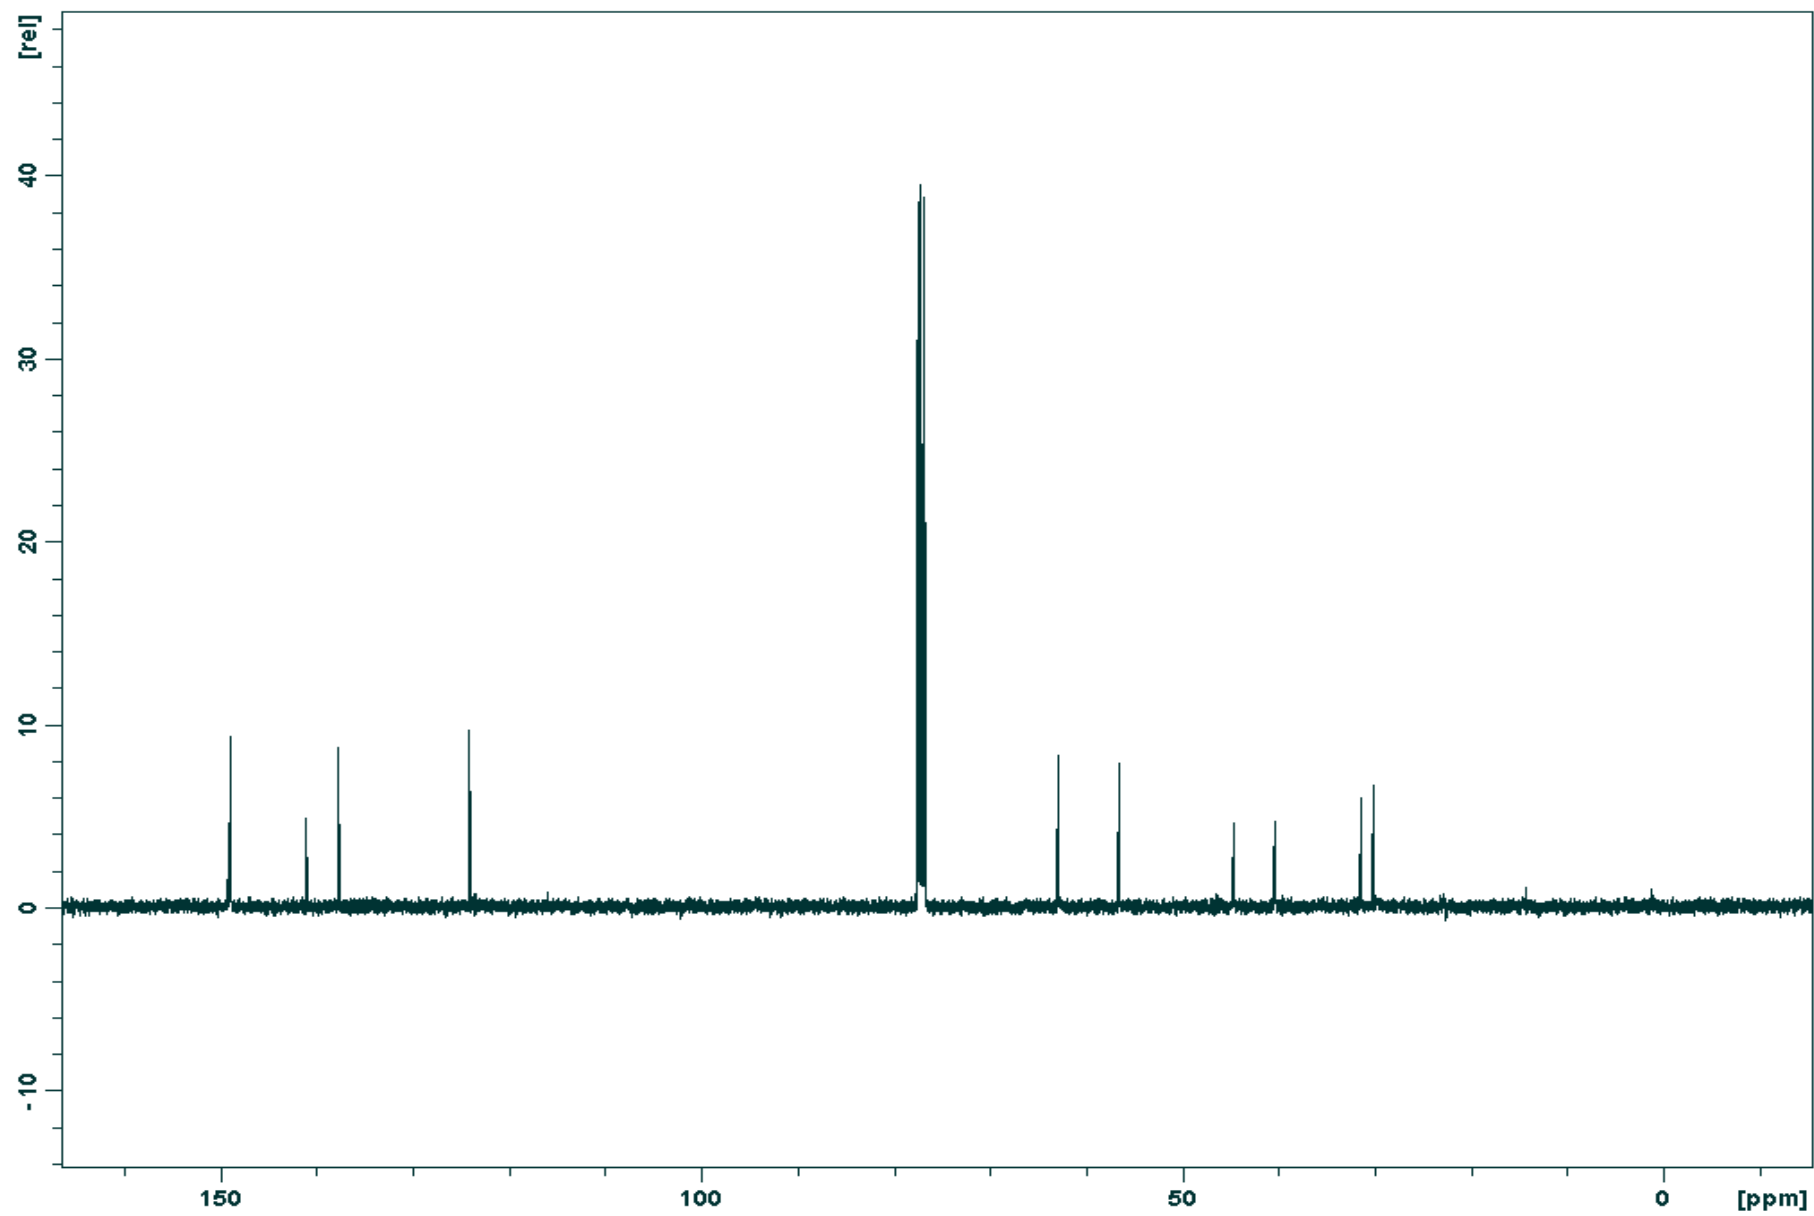

**<sup>1</sup>H-NMR spectrum of compound (+)-14 in CDCl<sub>3</sub>**

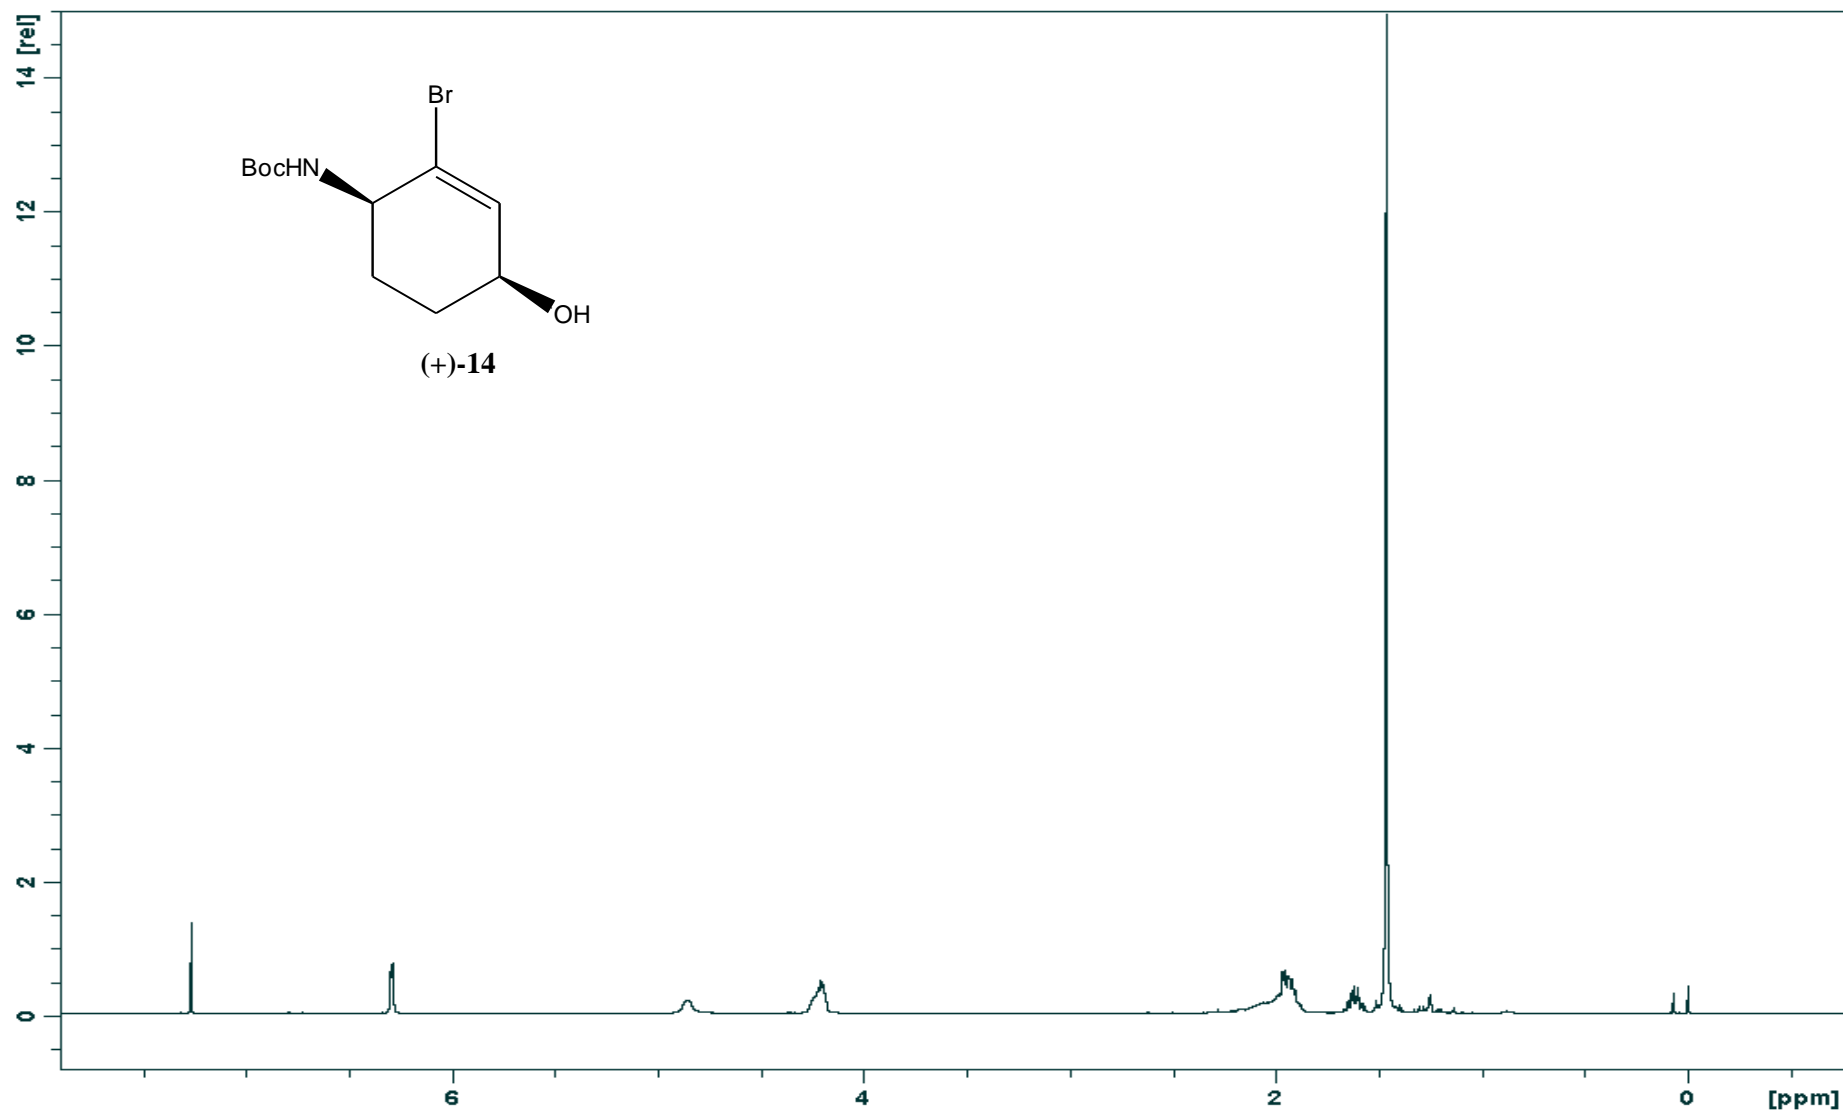

$^{13}\text{C}$ -NMR spectrum of compound (+)-14 in  $\text{CDCl}_3$

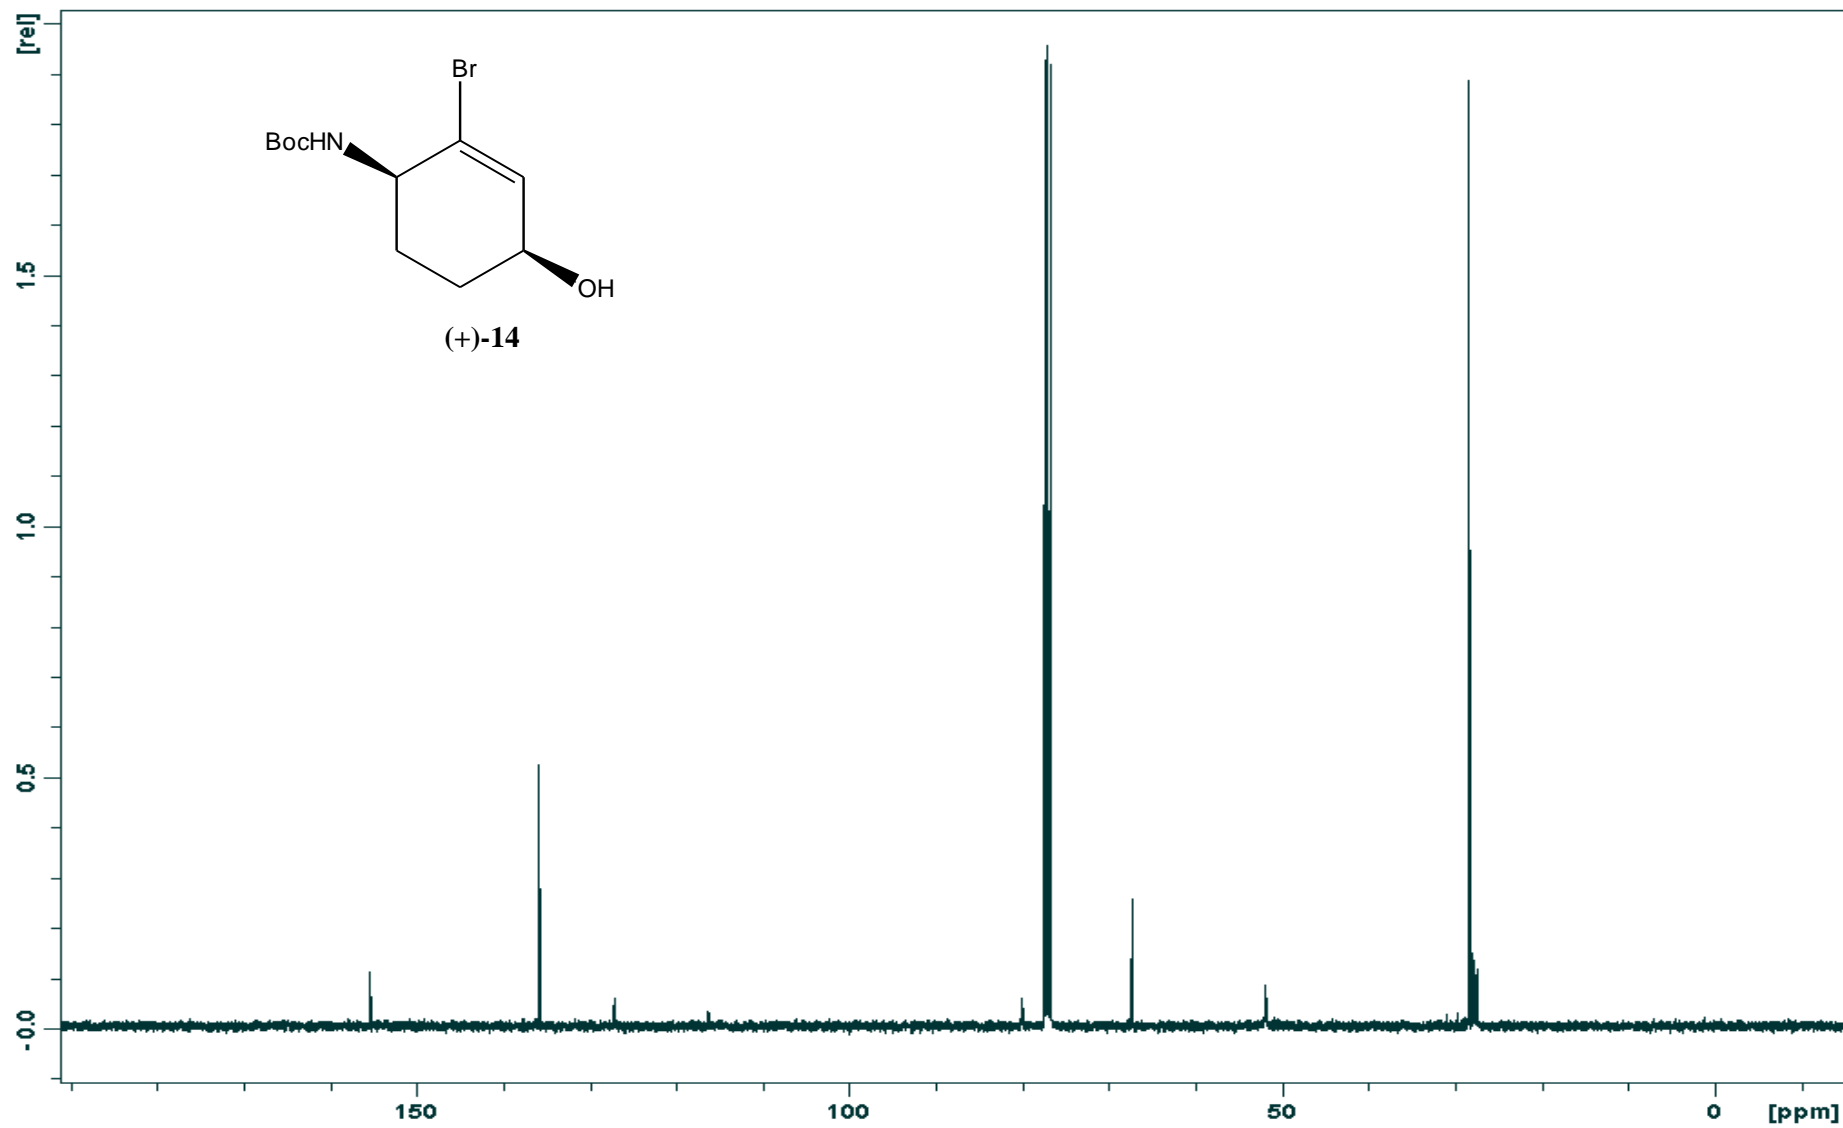

**<sup>1</sup>H-NMR spectrum of compound (-)-15 in CDCl<sub>3</sub>**

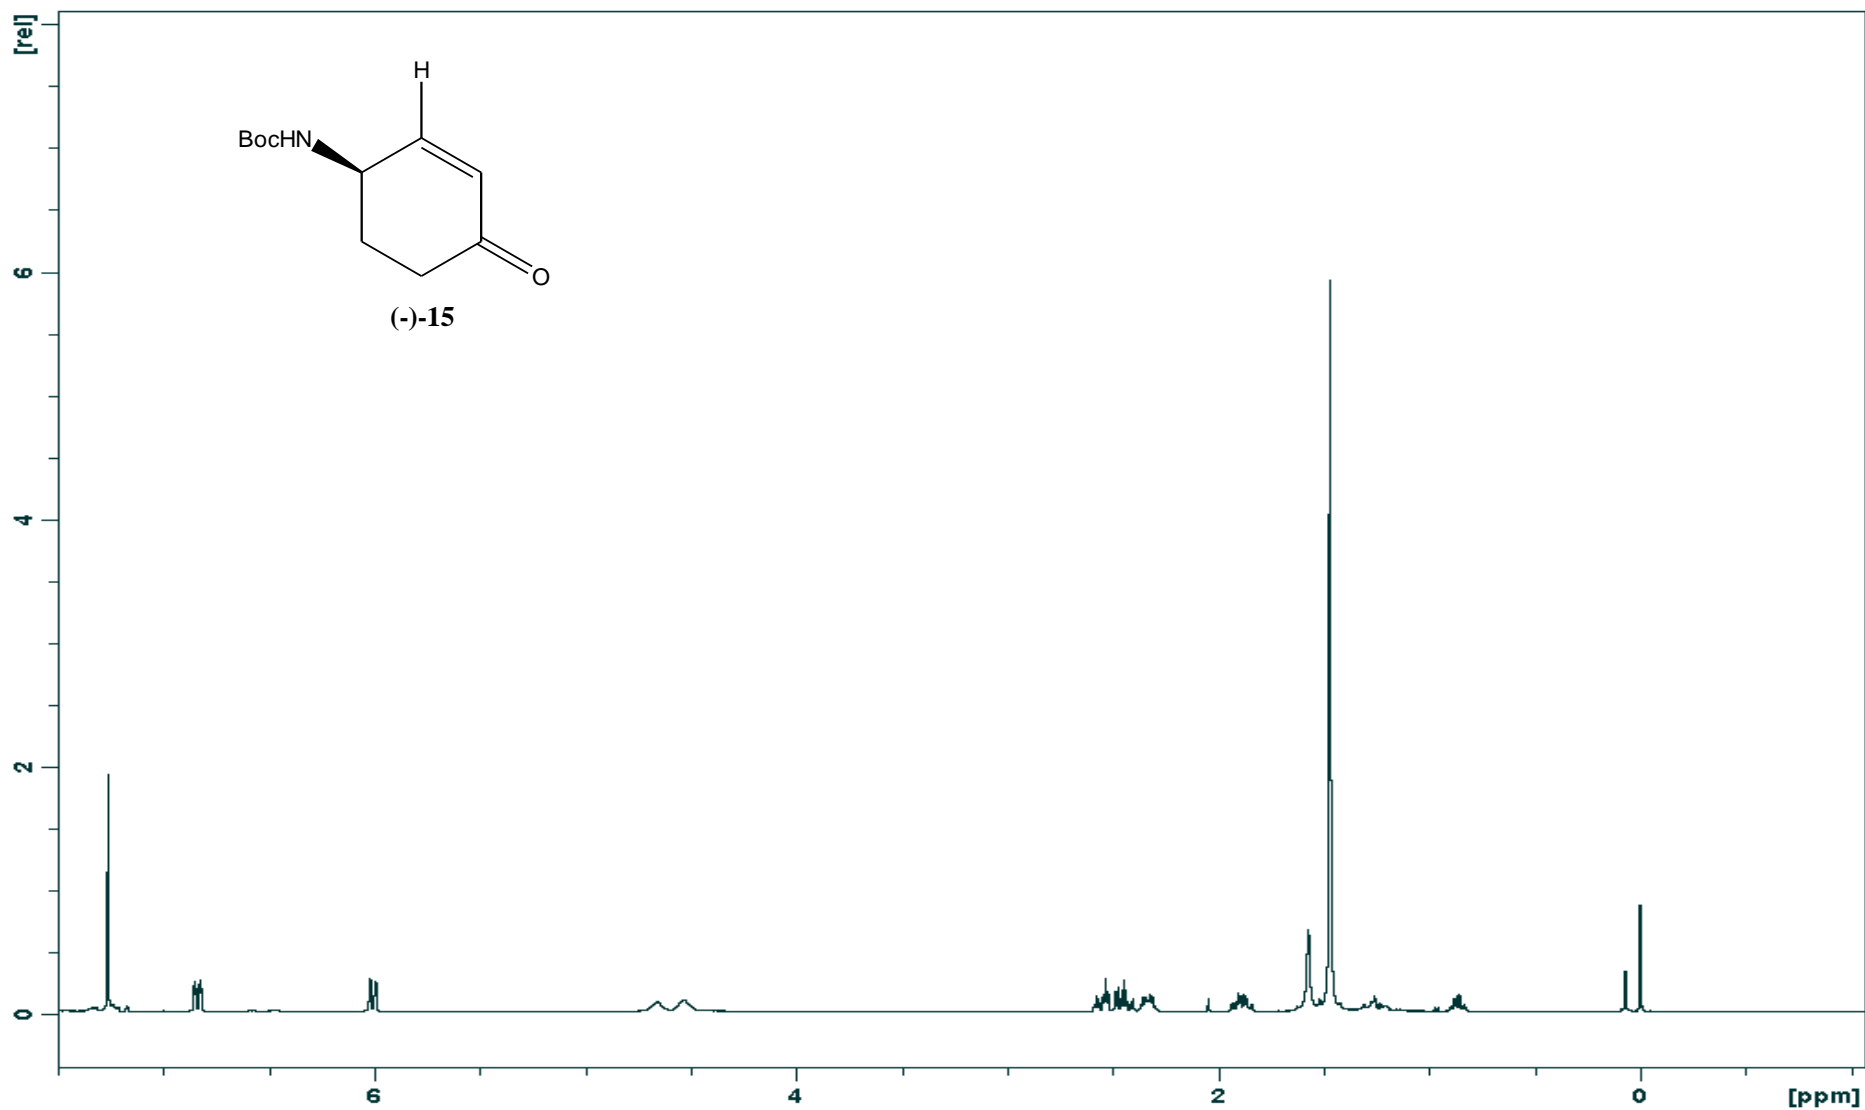



$^{13}\text{C}$ -NMR spectrum of compound (-)-15 in  $\text{CDCl}_3$

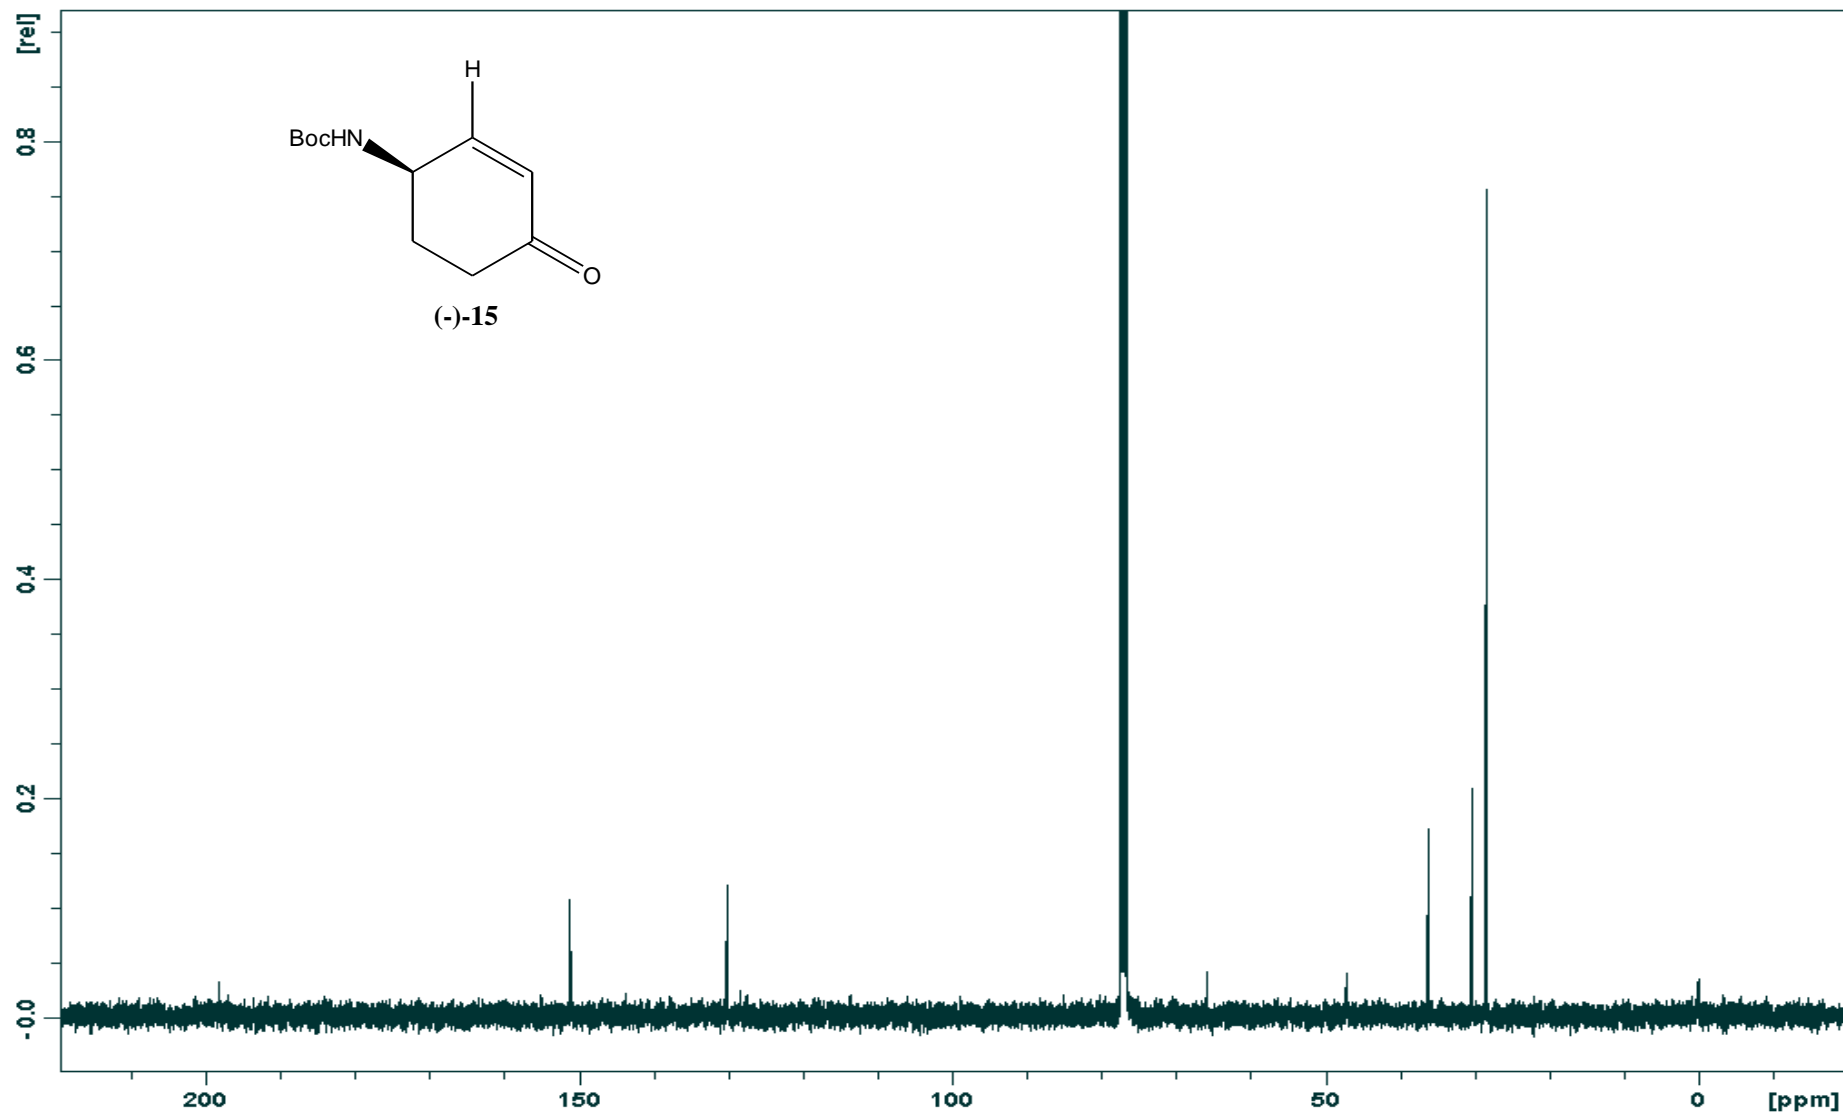

Supplement: c2ob06904k.pdf [file c2ob06904k.pdf]
